# Supplementary material for: Synthesis of tetrahydro-1H-indolo[2,3-b]pyrrolo[3,2-c]quinolonesviaintramolecular oxidative ring rearrangement of tetrahydro-β-carbolines and their biological evaluation
Source: Royal Society of Chemistry journal article supplement (doi:10.1039/c7nj04616b), 2018-01-01
Supplement: c7nj04616b1.pdf [file c7nj04616b1.pdf]

Dec27-2017  
JC-CB-9A

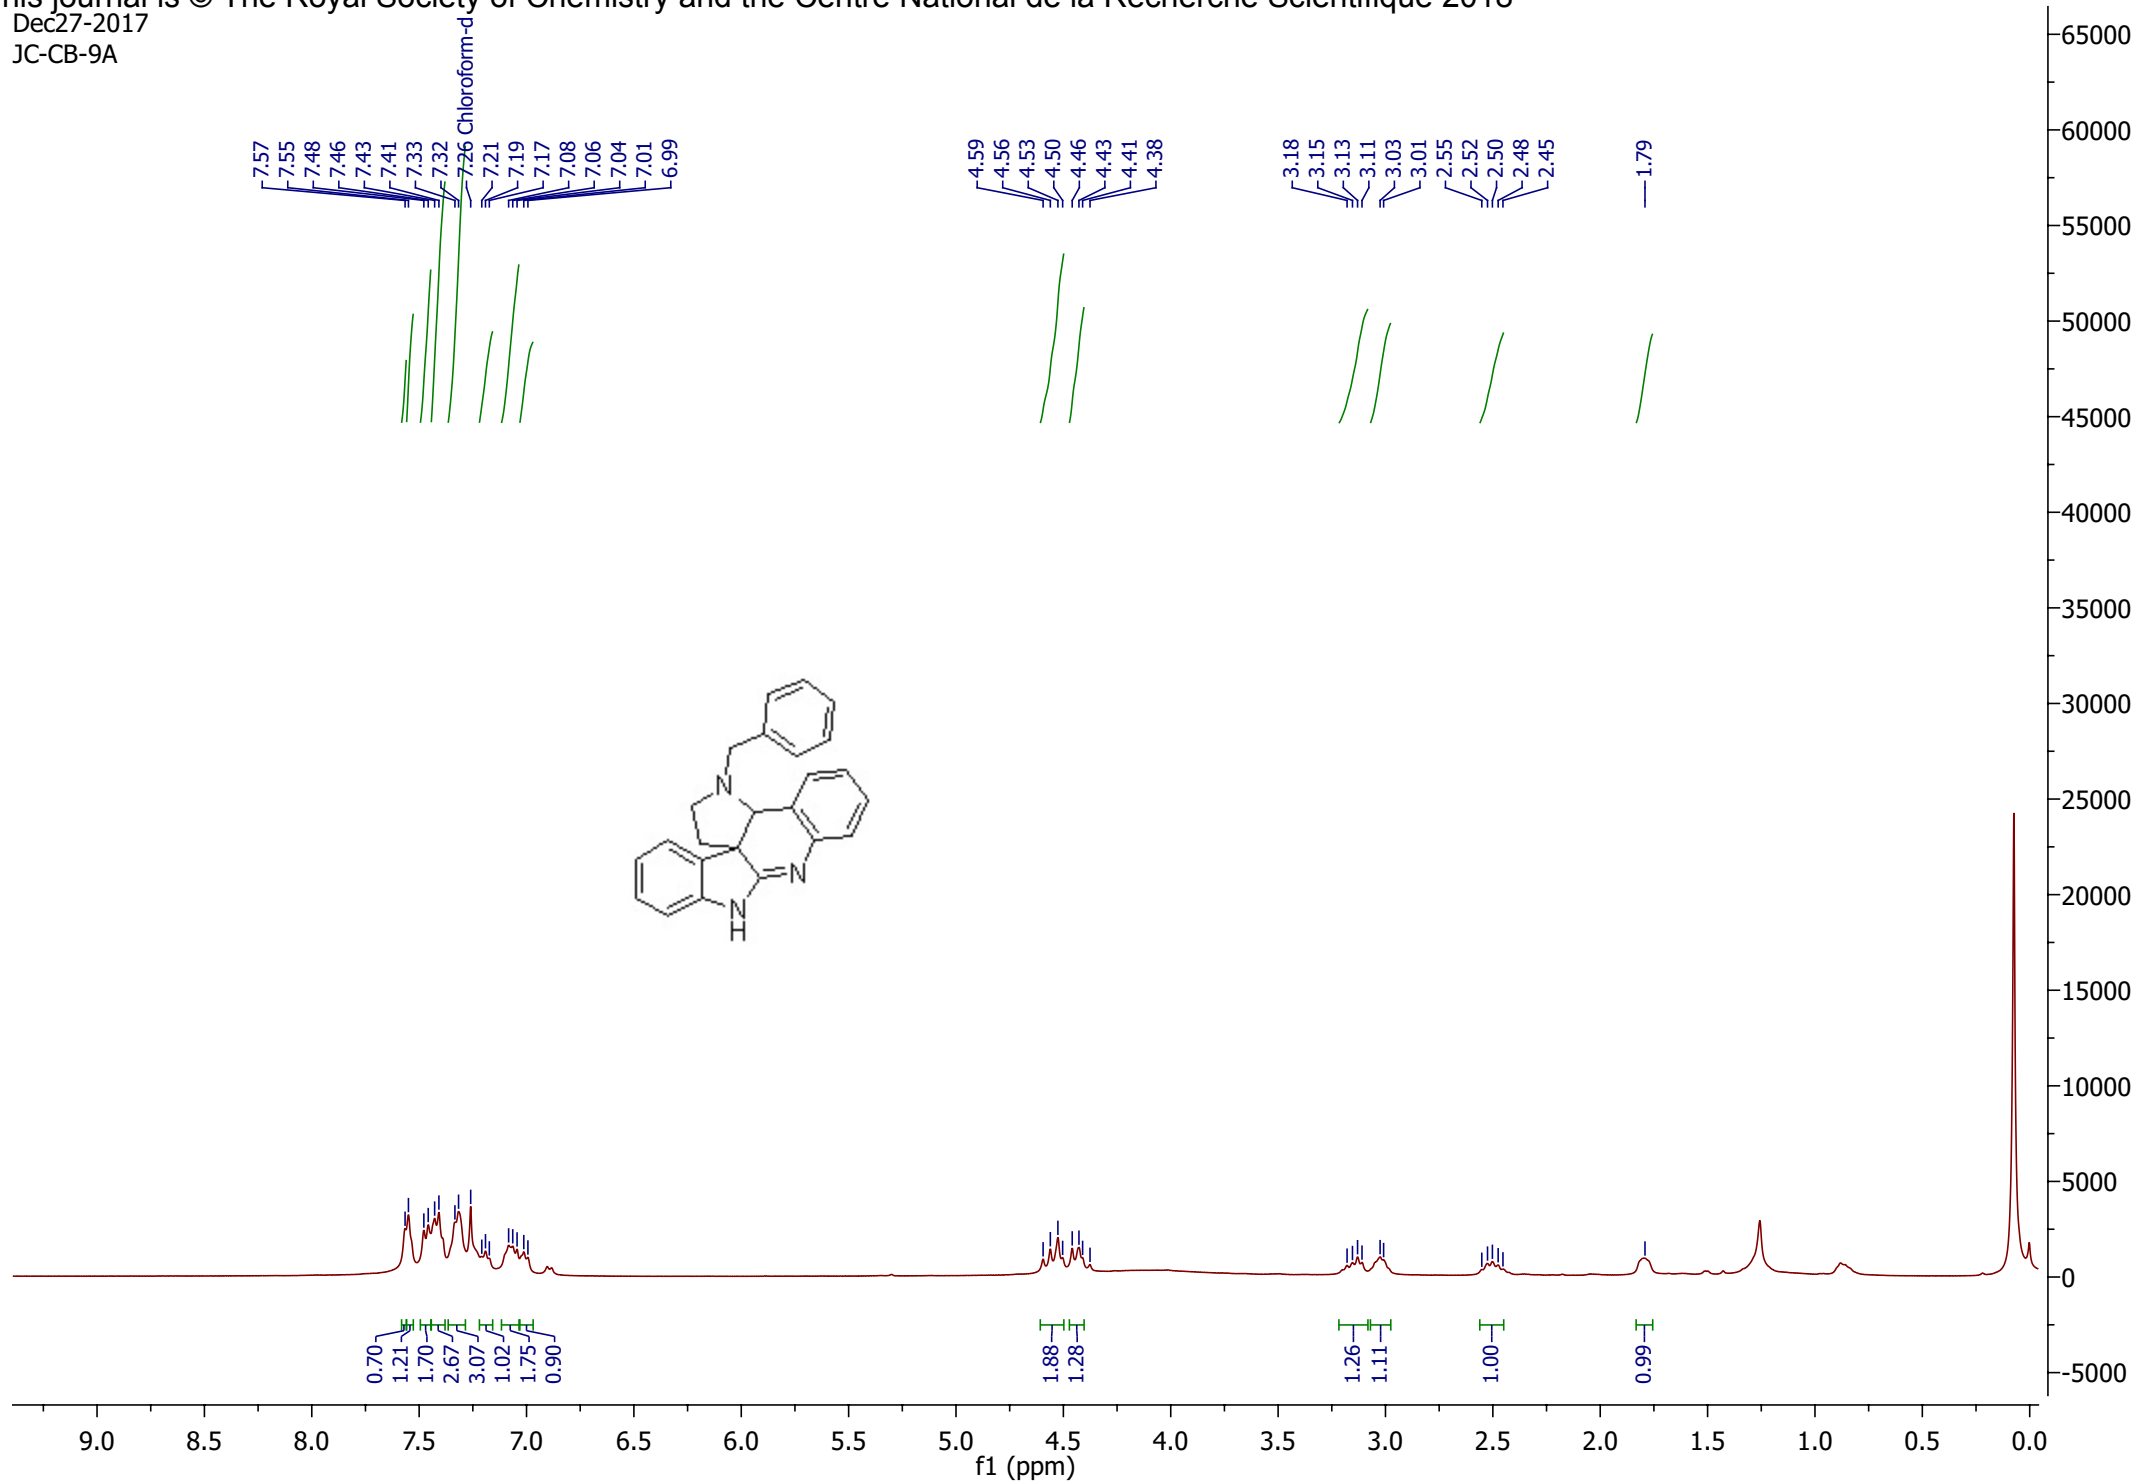

Dec27-2017  
JC-CB-9A

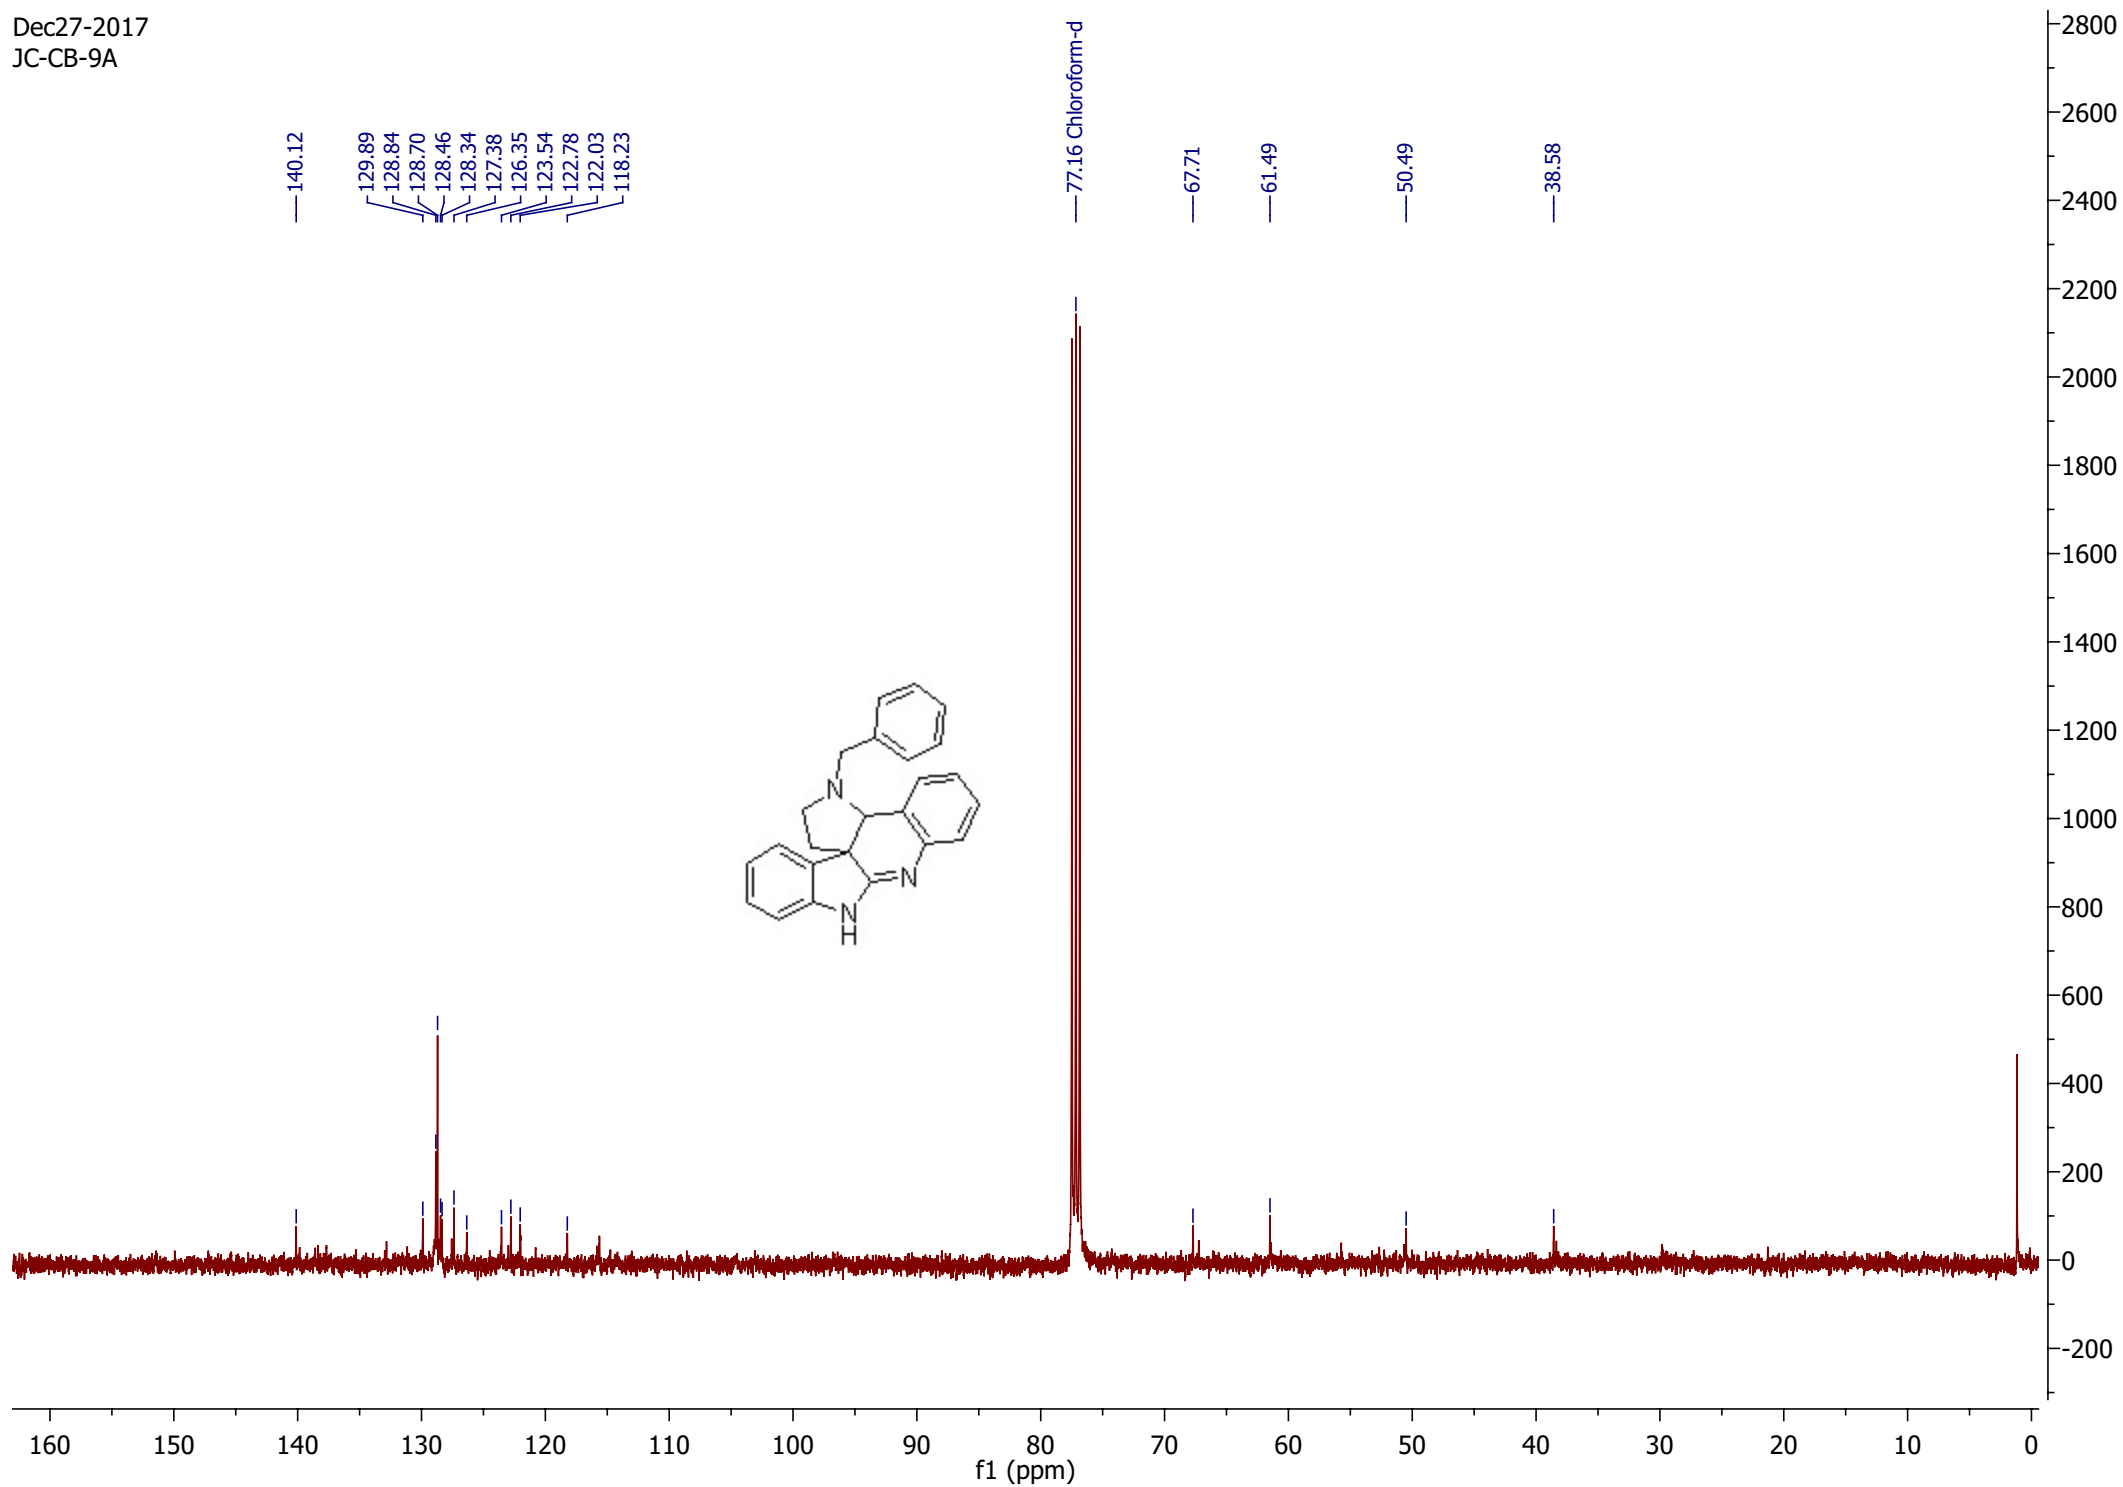

New folder  
CS-F(BE)

9b

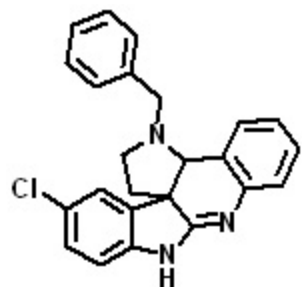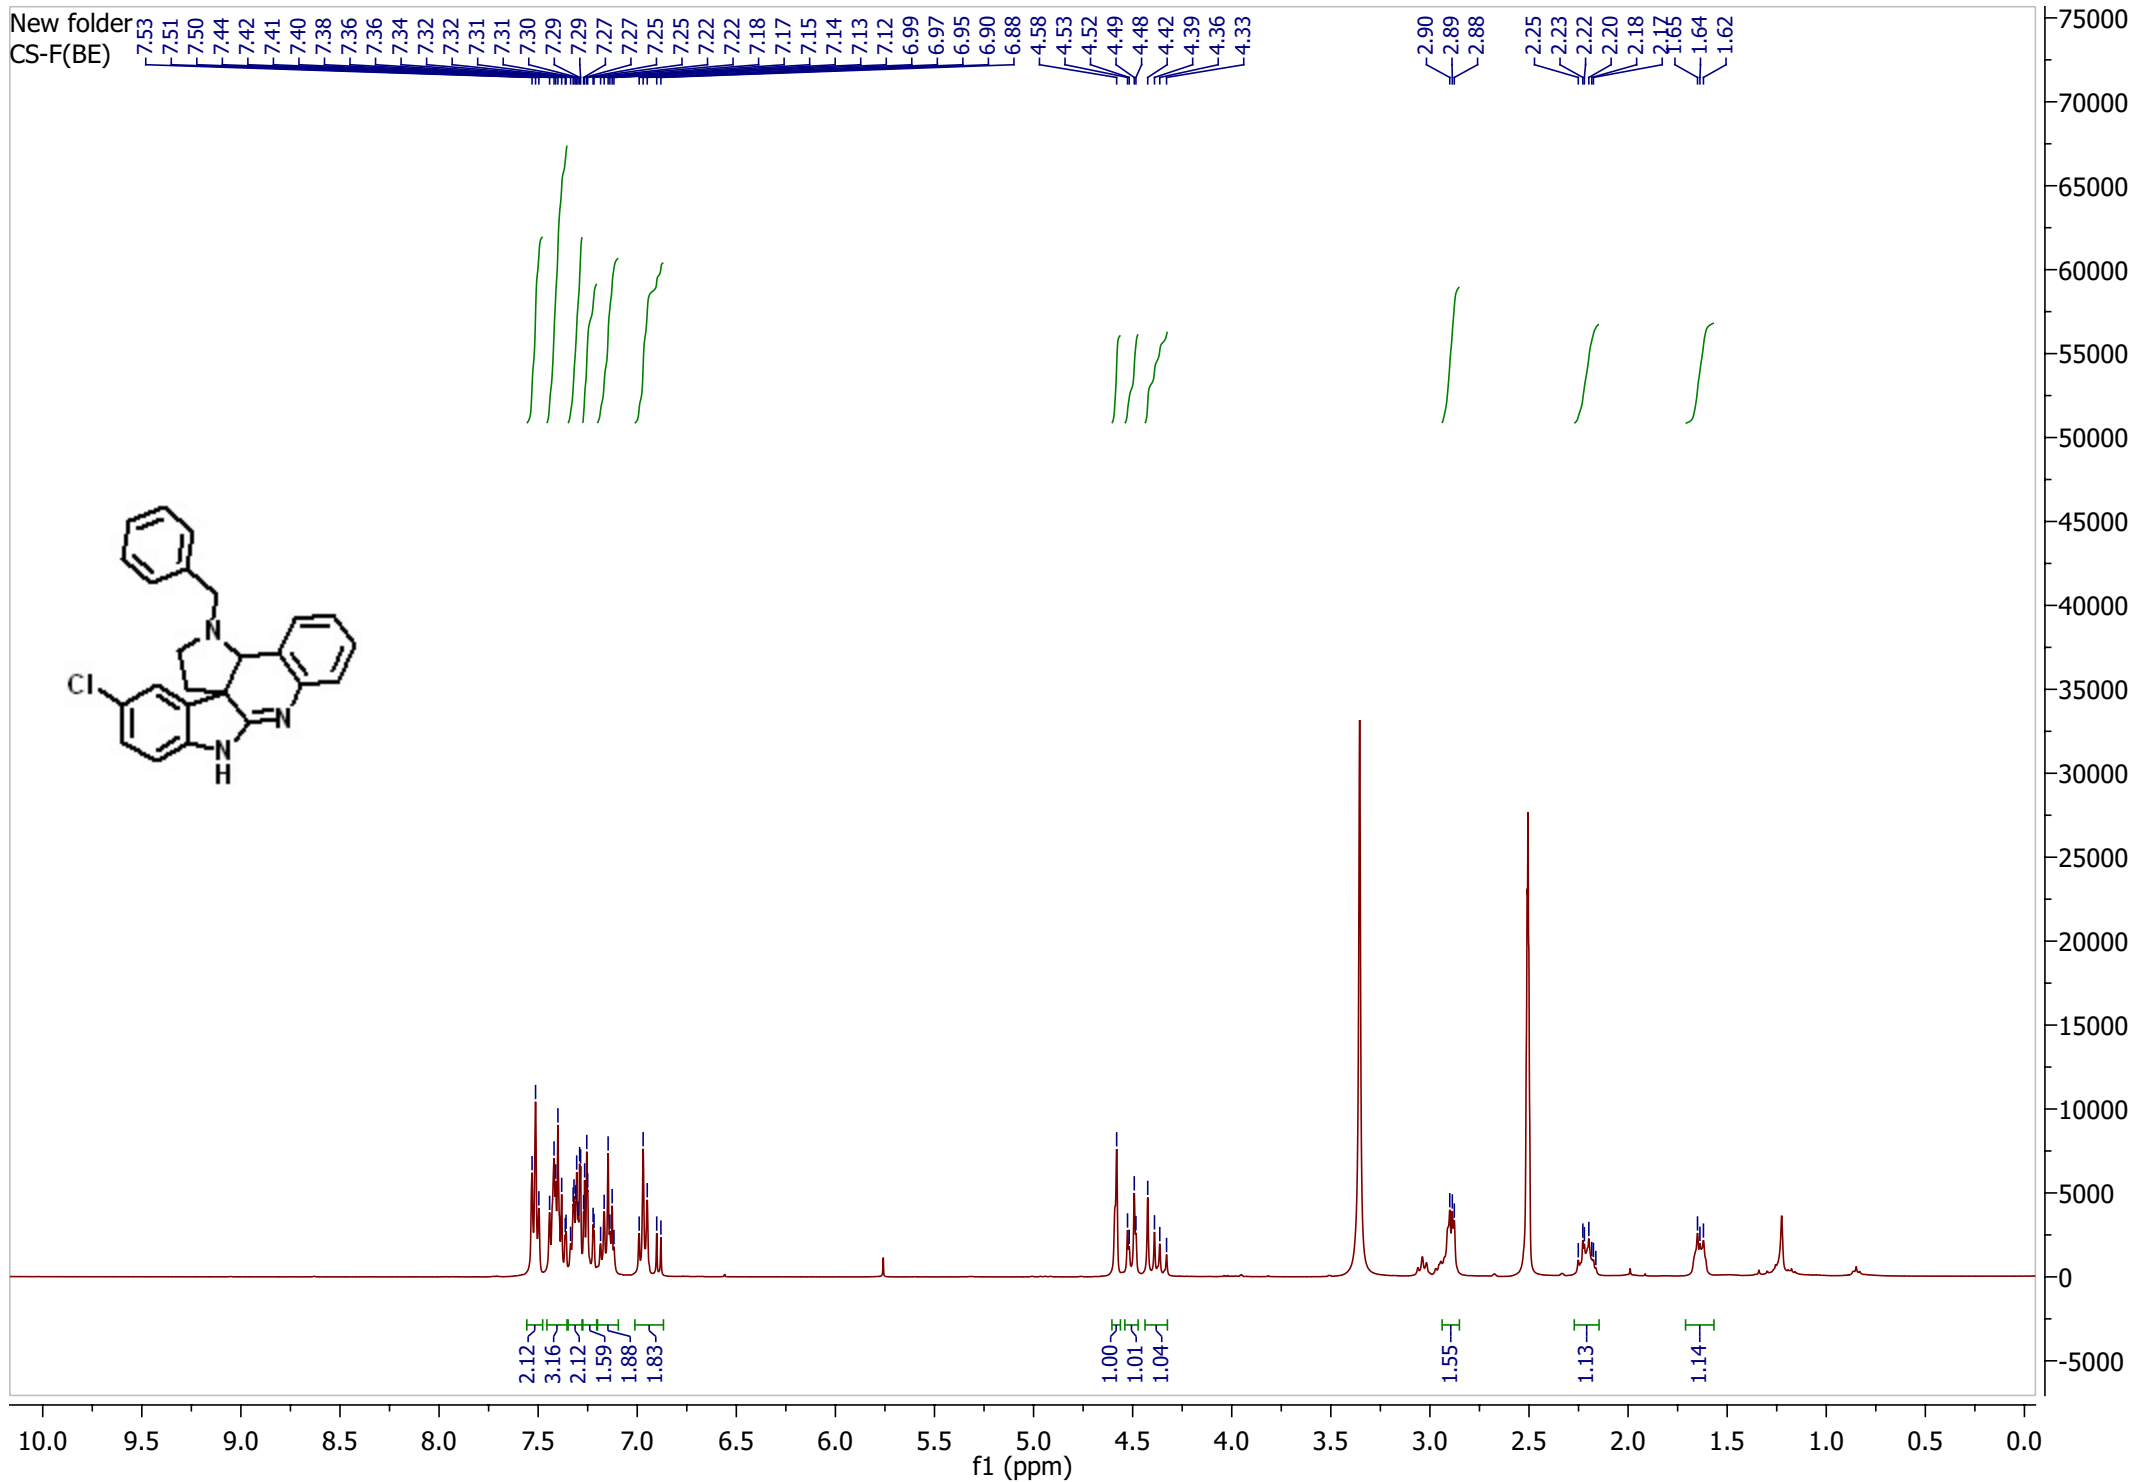

May30-2017  
CB-PA-03

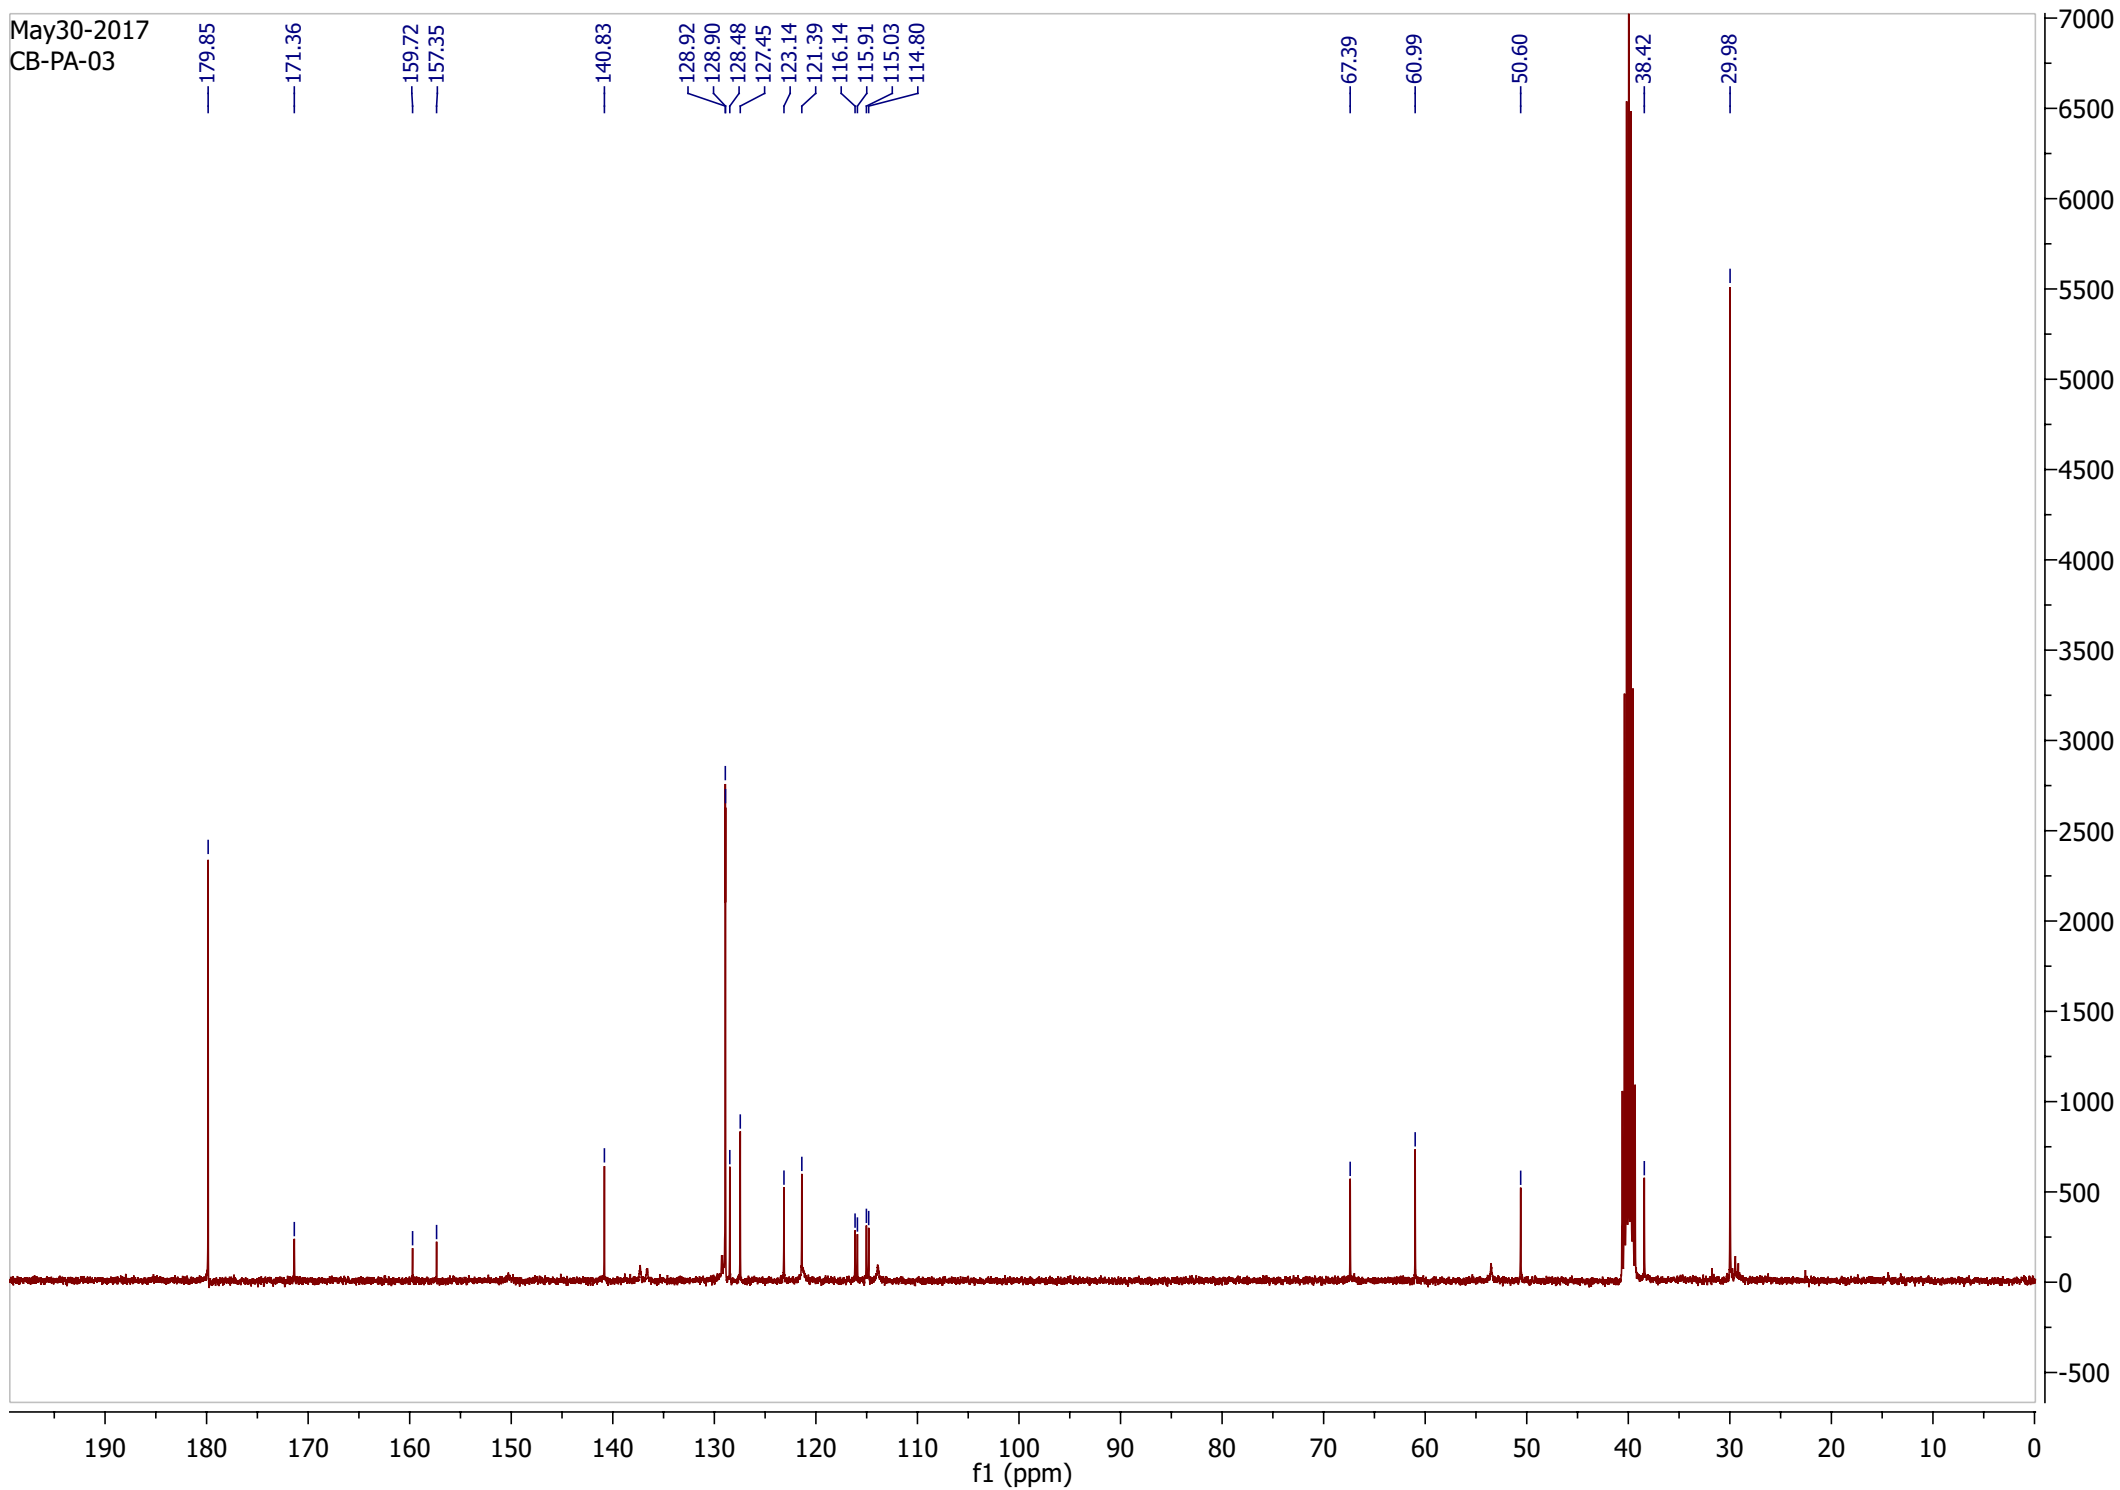

New folder  
CS-F(ME)

9c

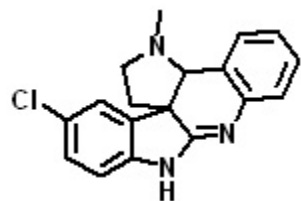

7.45  
7.43  
7.29  
7.28  
7.27  
7.26  
7.25  
7.25  
7.18  
7.16  
7.14  
7.12  
7.00  
6.99  
6.97  
6.95  
6.93

4.27

2.99  
2.98  
2.97  
2.95  
2.94  
2.93  
2.91  
2.22  
2.20  
2.17  
2.17  
2.15  
1.66  
1.64  
1.63  
1.61

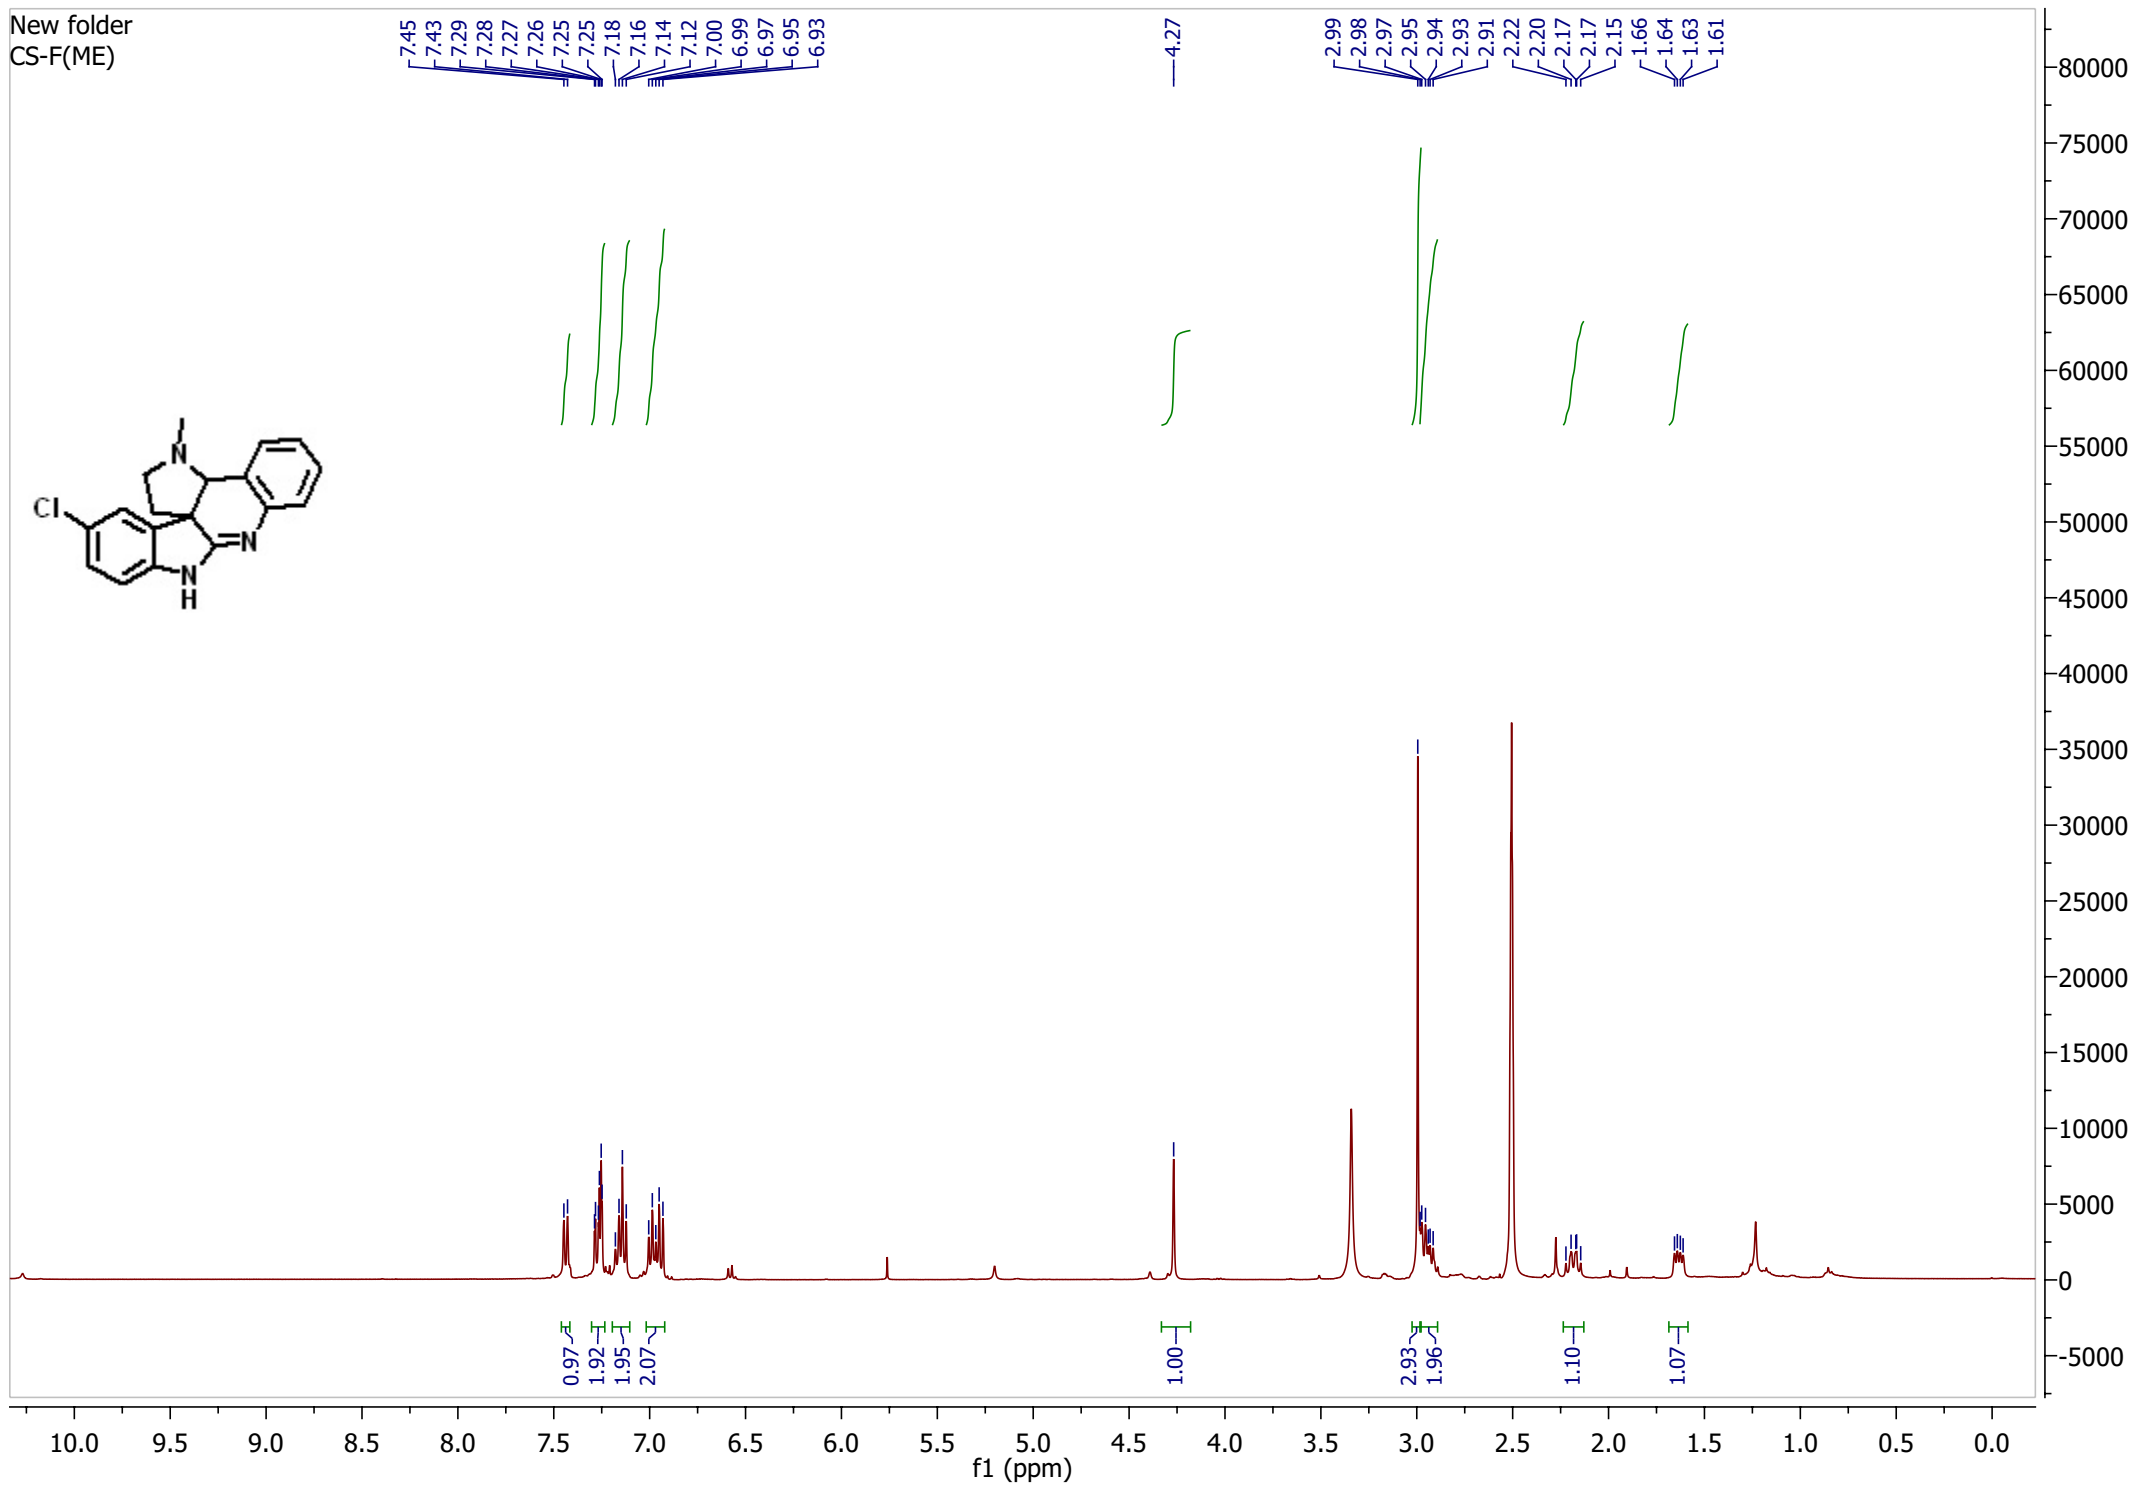

May30-2017  
CB-PA-04

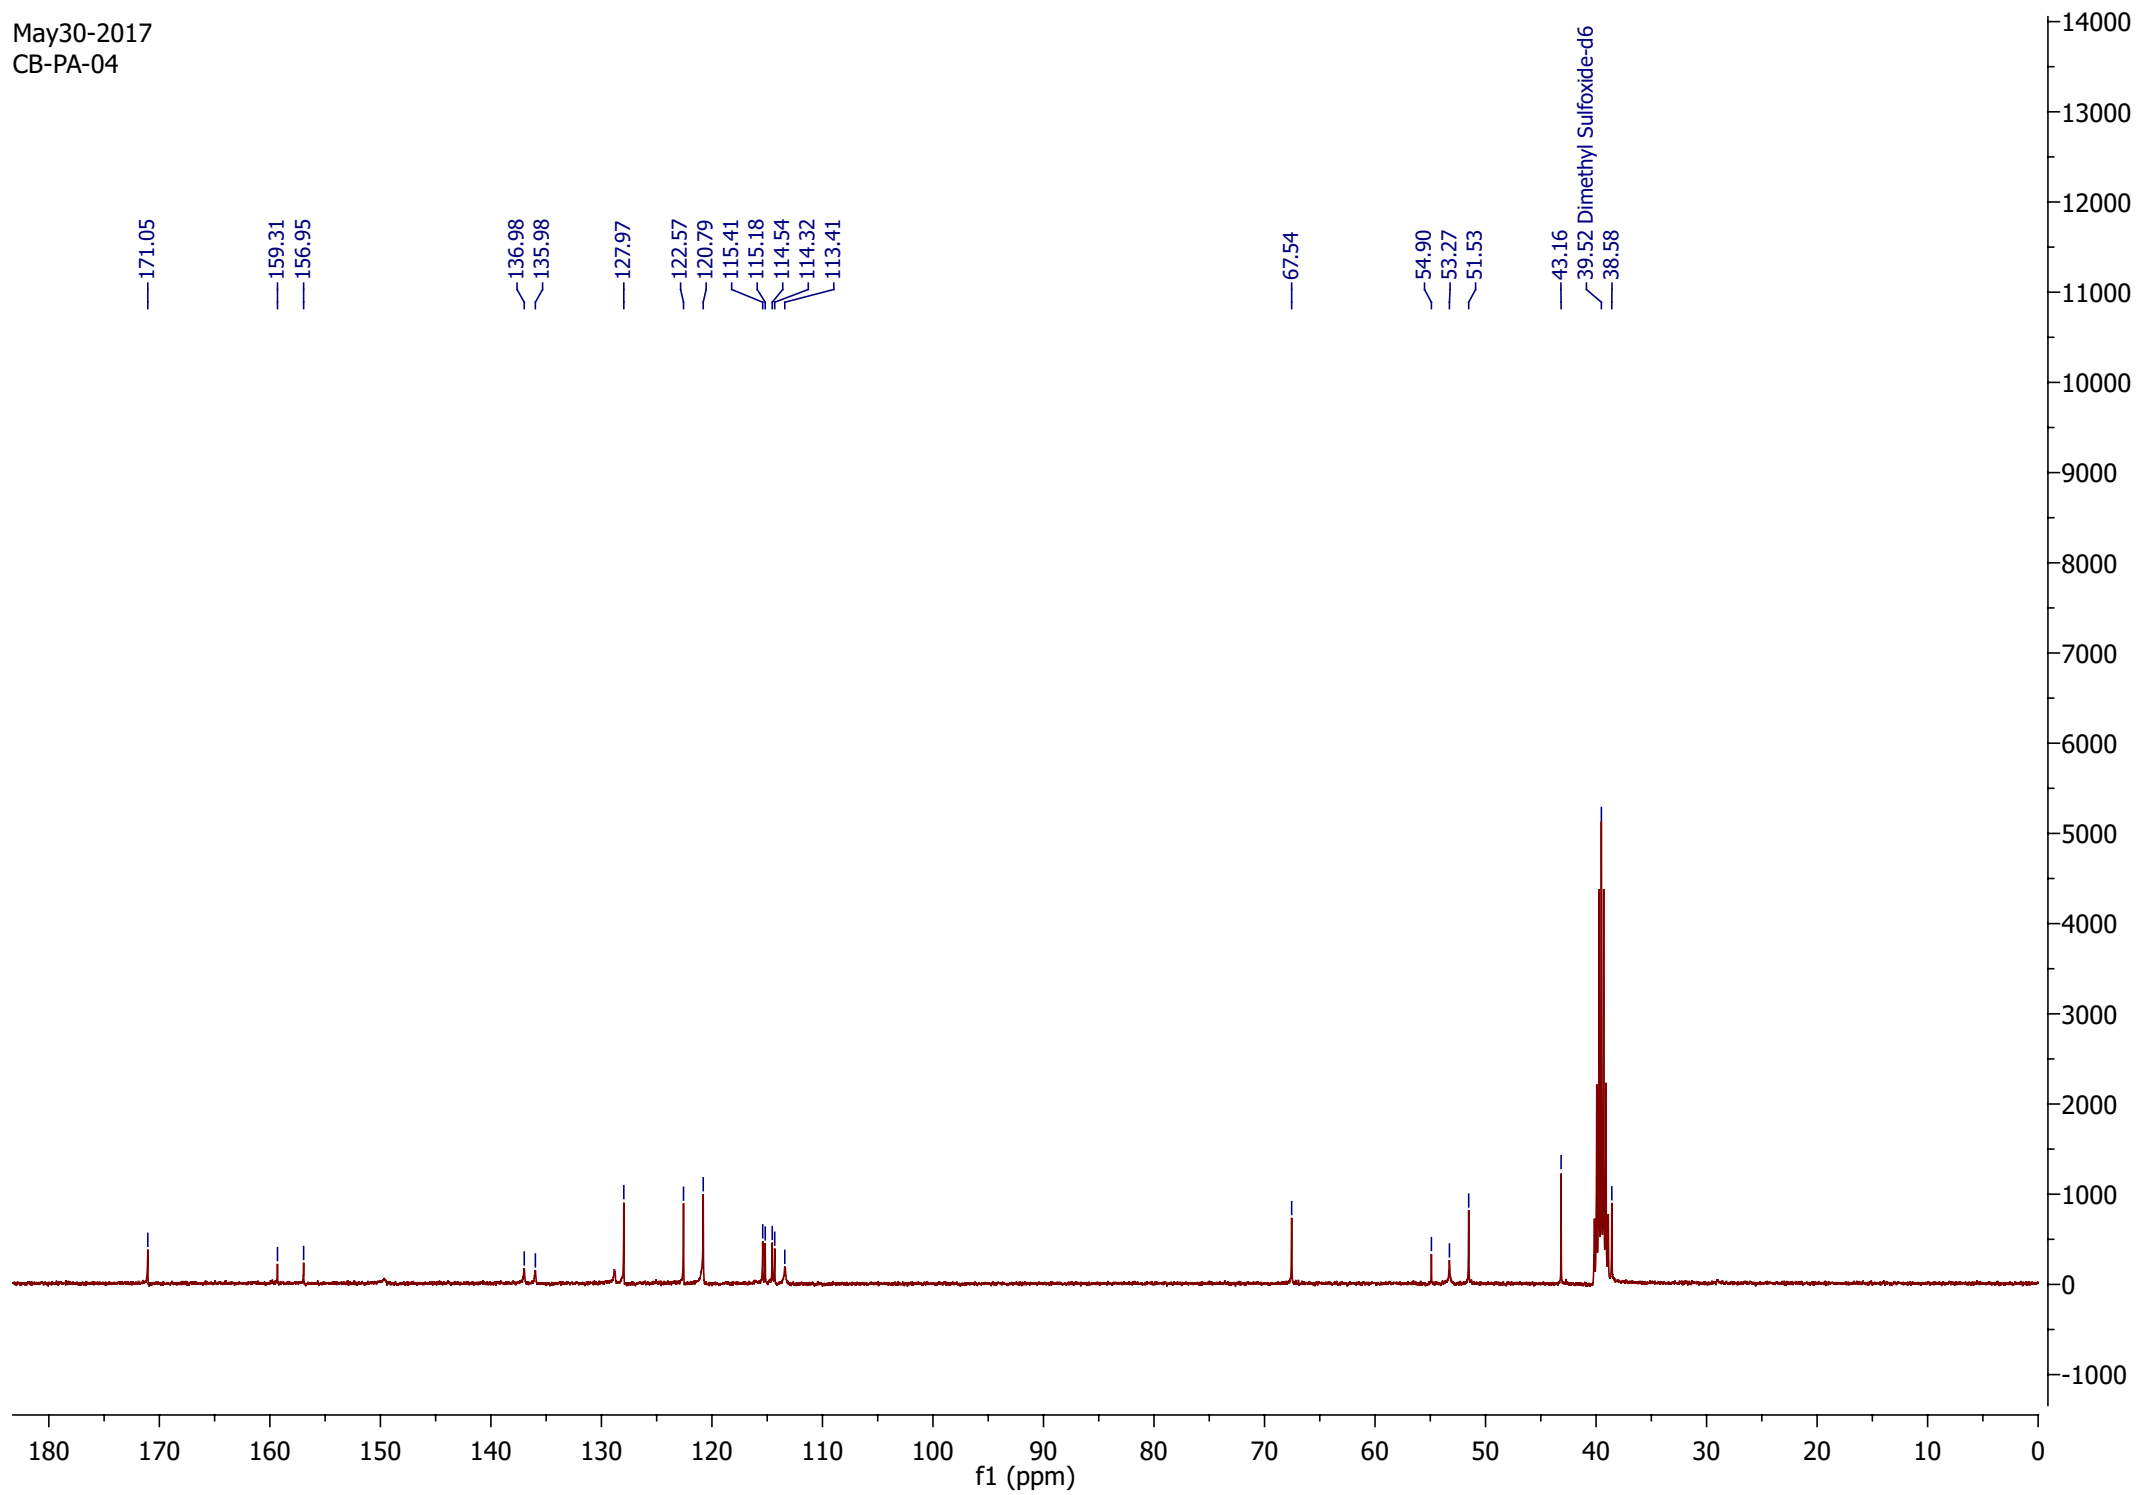

Jan30-2017  
CS-34

9d

Chloroform-d

7.55  
7.53  
7.43  
7.42  
7.40  
7.38  
7.35  
7.33  
7.30  
7.28  
7.26  
7.21  
7.19  
7.14  
7.13  
7.11  
7.07  
7.05  
7.03  
6.92  
6.91  
6.90  
6.89  
6.88  
6.87

4.55  
4.51  
4.48  
4.42  
4.39

3.16  
3.14  
3.12  
3.05  
3.03  
3.02  
3.00  
2.99  
2.98  
2.49  
2.47  
2.46  
2.44  
2.43  
2.41  
1.81  
1.79  
1.78  
1.76

1.02  
1.20  
3.33  
2.50  
0.99  
1.17  
2.04  
1.12

2.24  
1.02

1.01  
1.09

1.25

1.12

8.5 8.0 7.5 7.0 6.5 6.0 5.5 5.0 4.5 4.0 3.5 3.0 2.5 2.0 1.5 1.0 0.5 0.0

f1 (ppm)

1E+05  
90000  
80000  
70000  
60000  
50000  
40000  
30000  
20000  
10000  
0

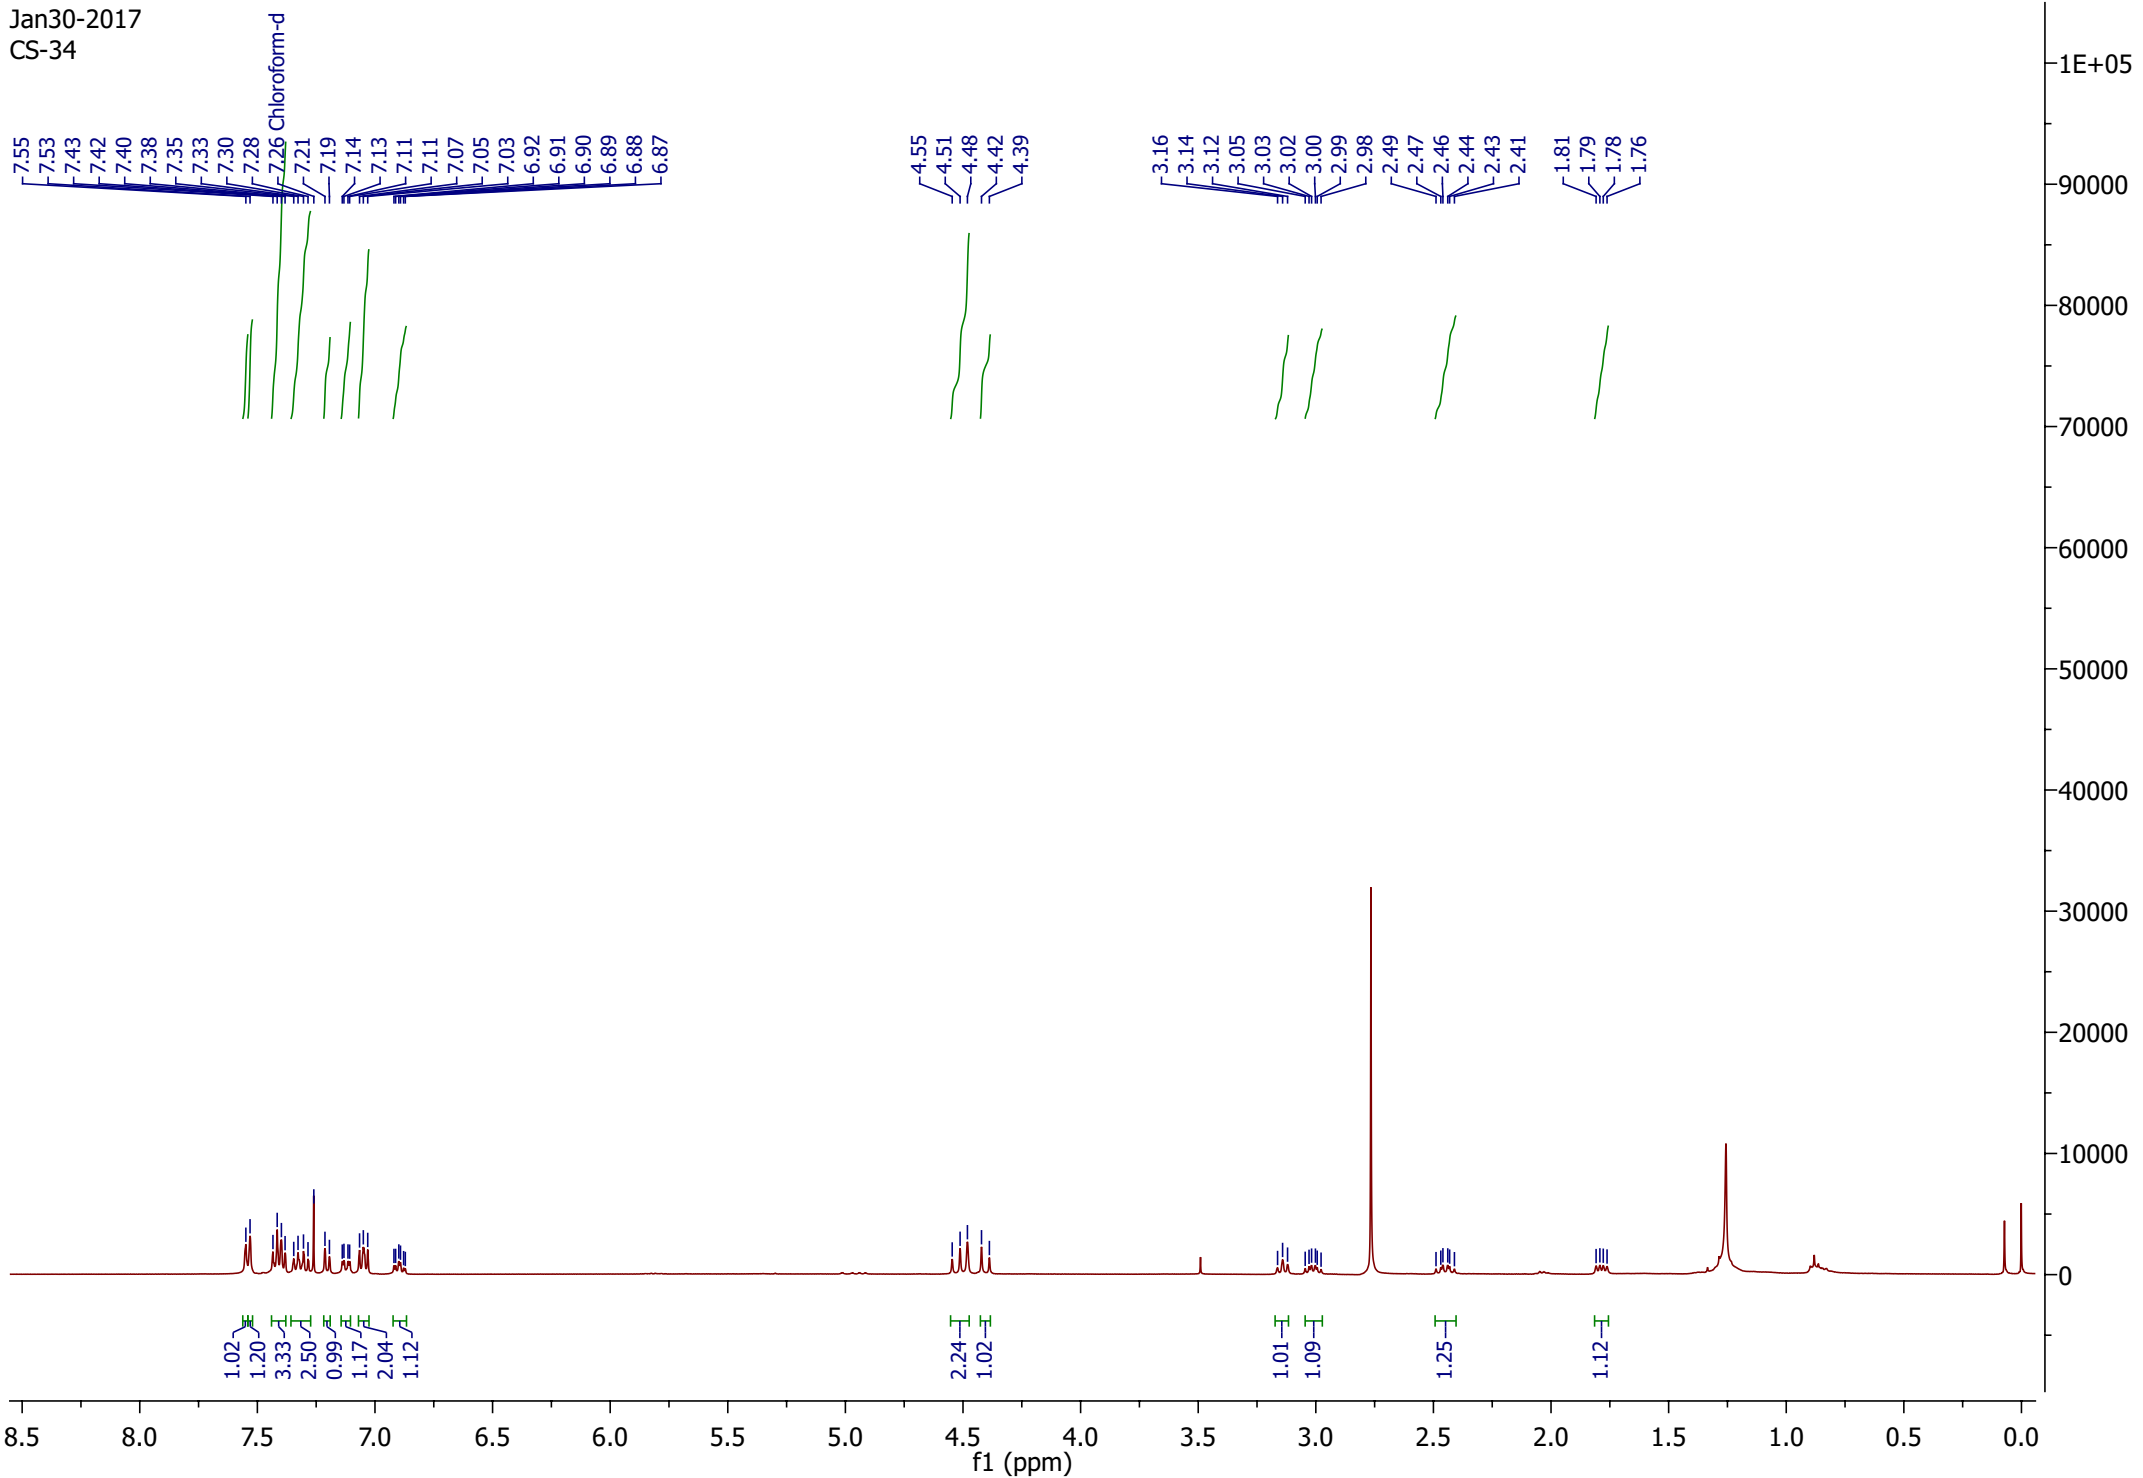

Apr11-2017  
Cb-PA-05

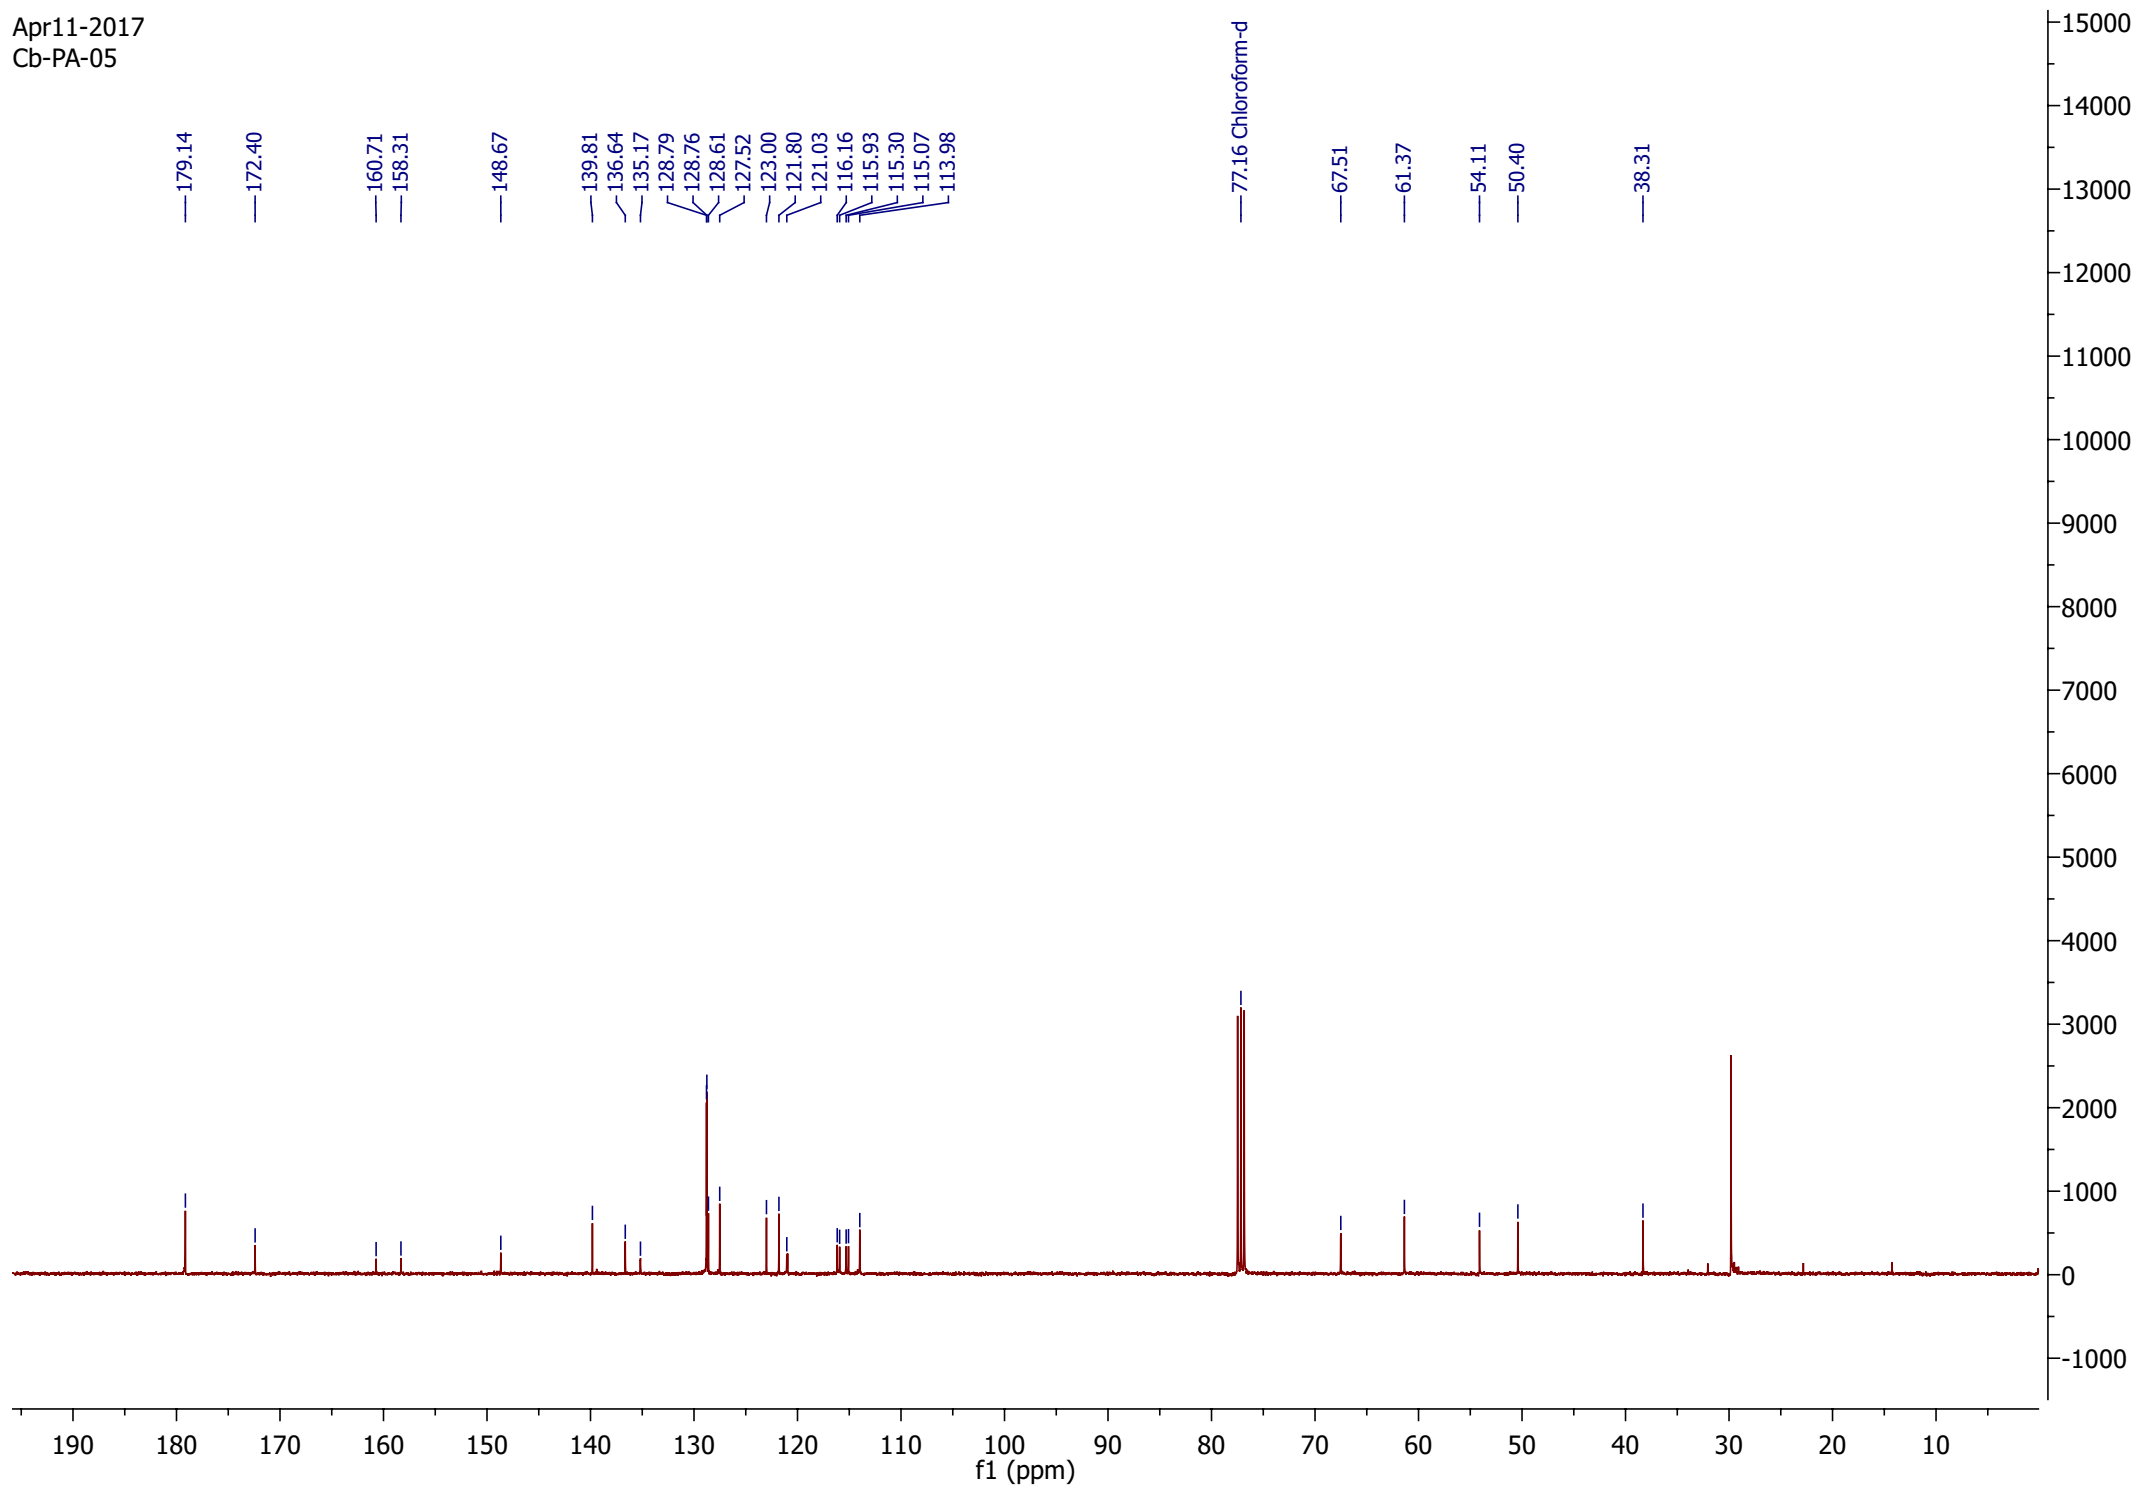



Jan30-2017  
CS-33

9e

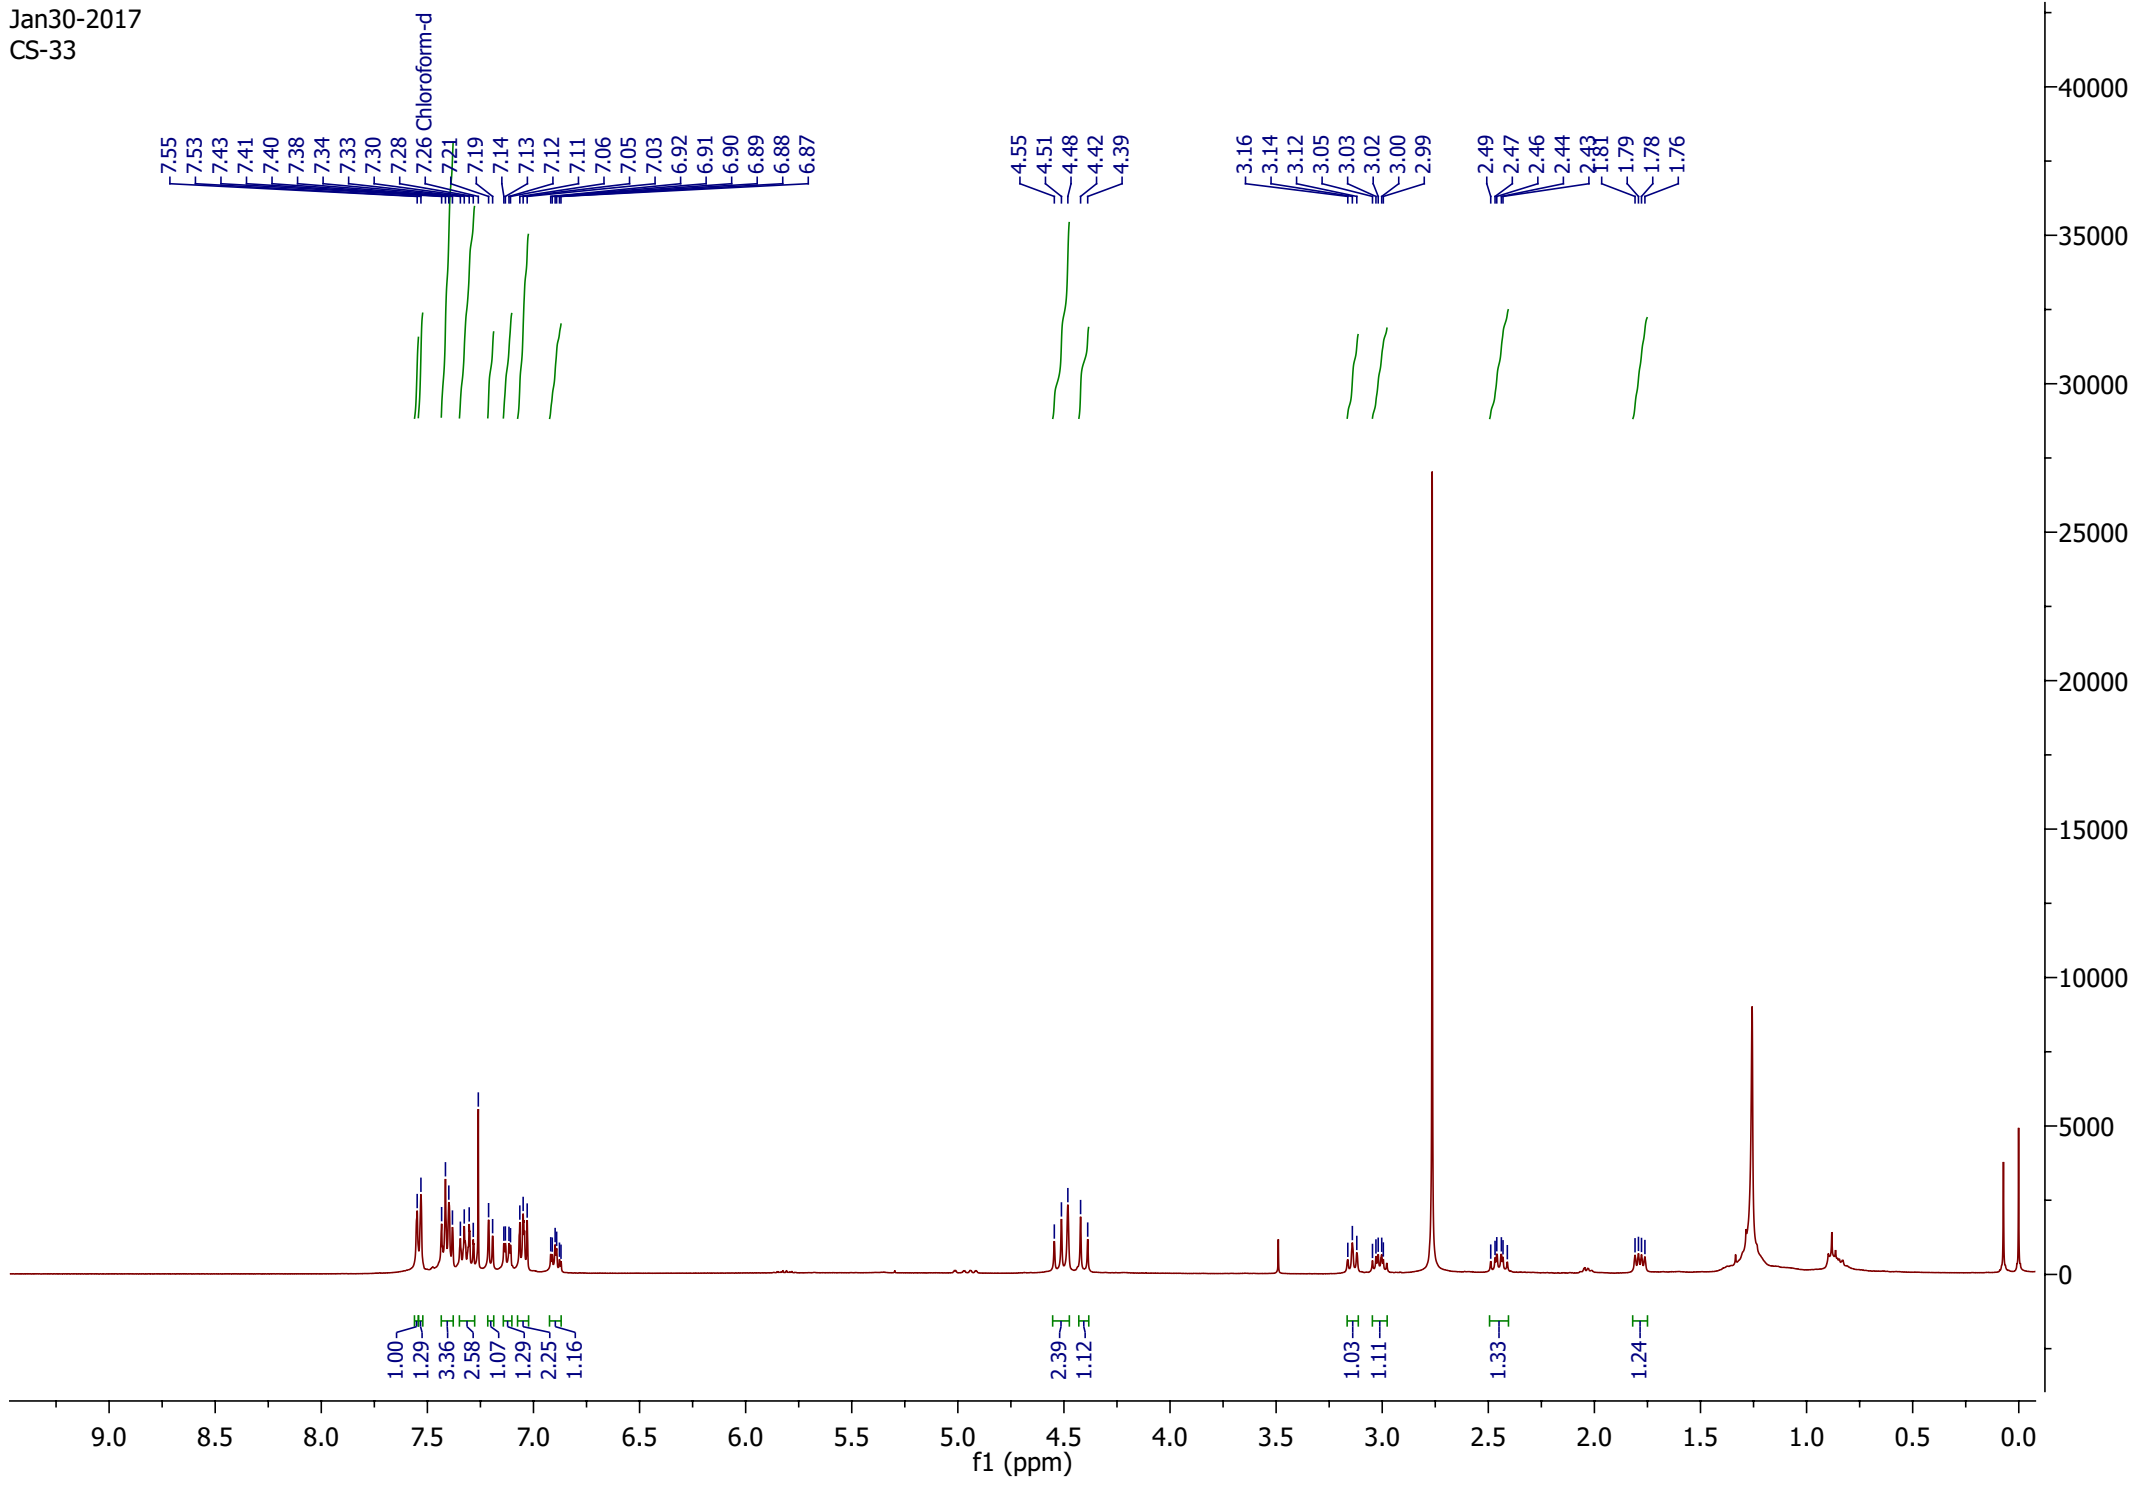

JC-CB-9E

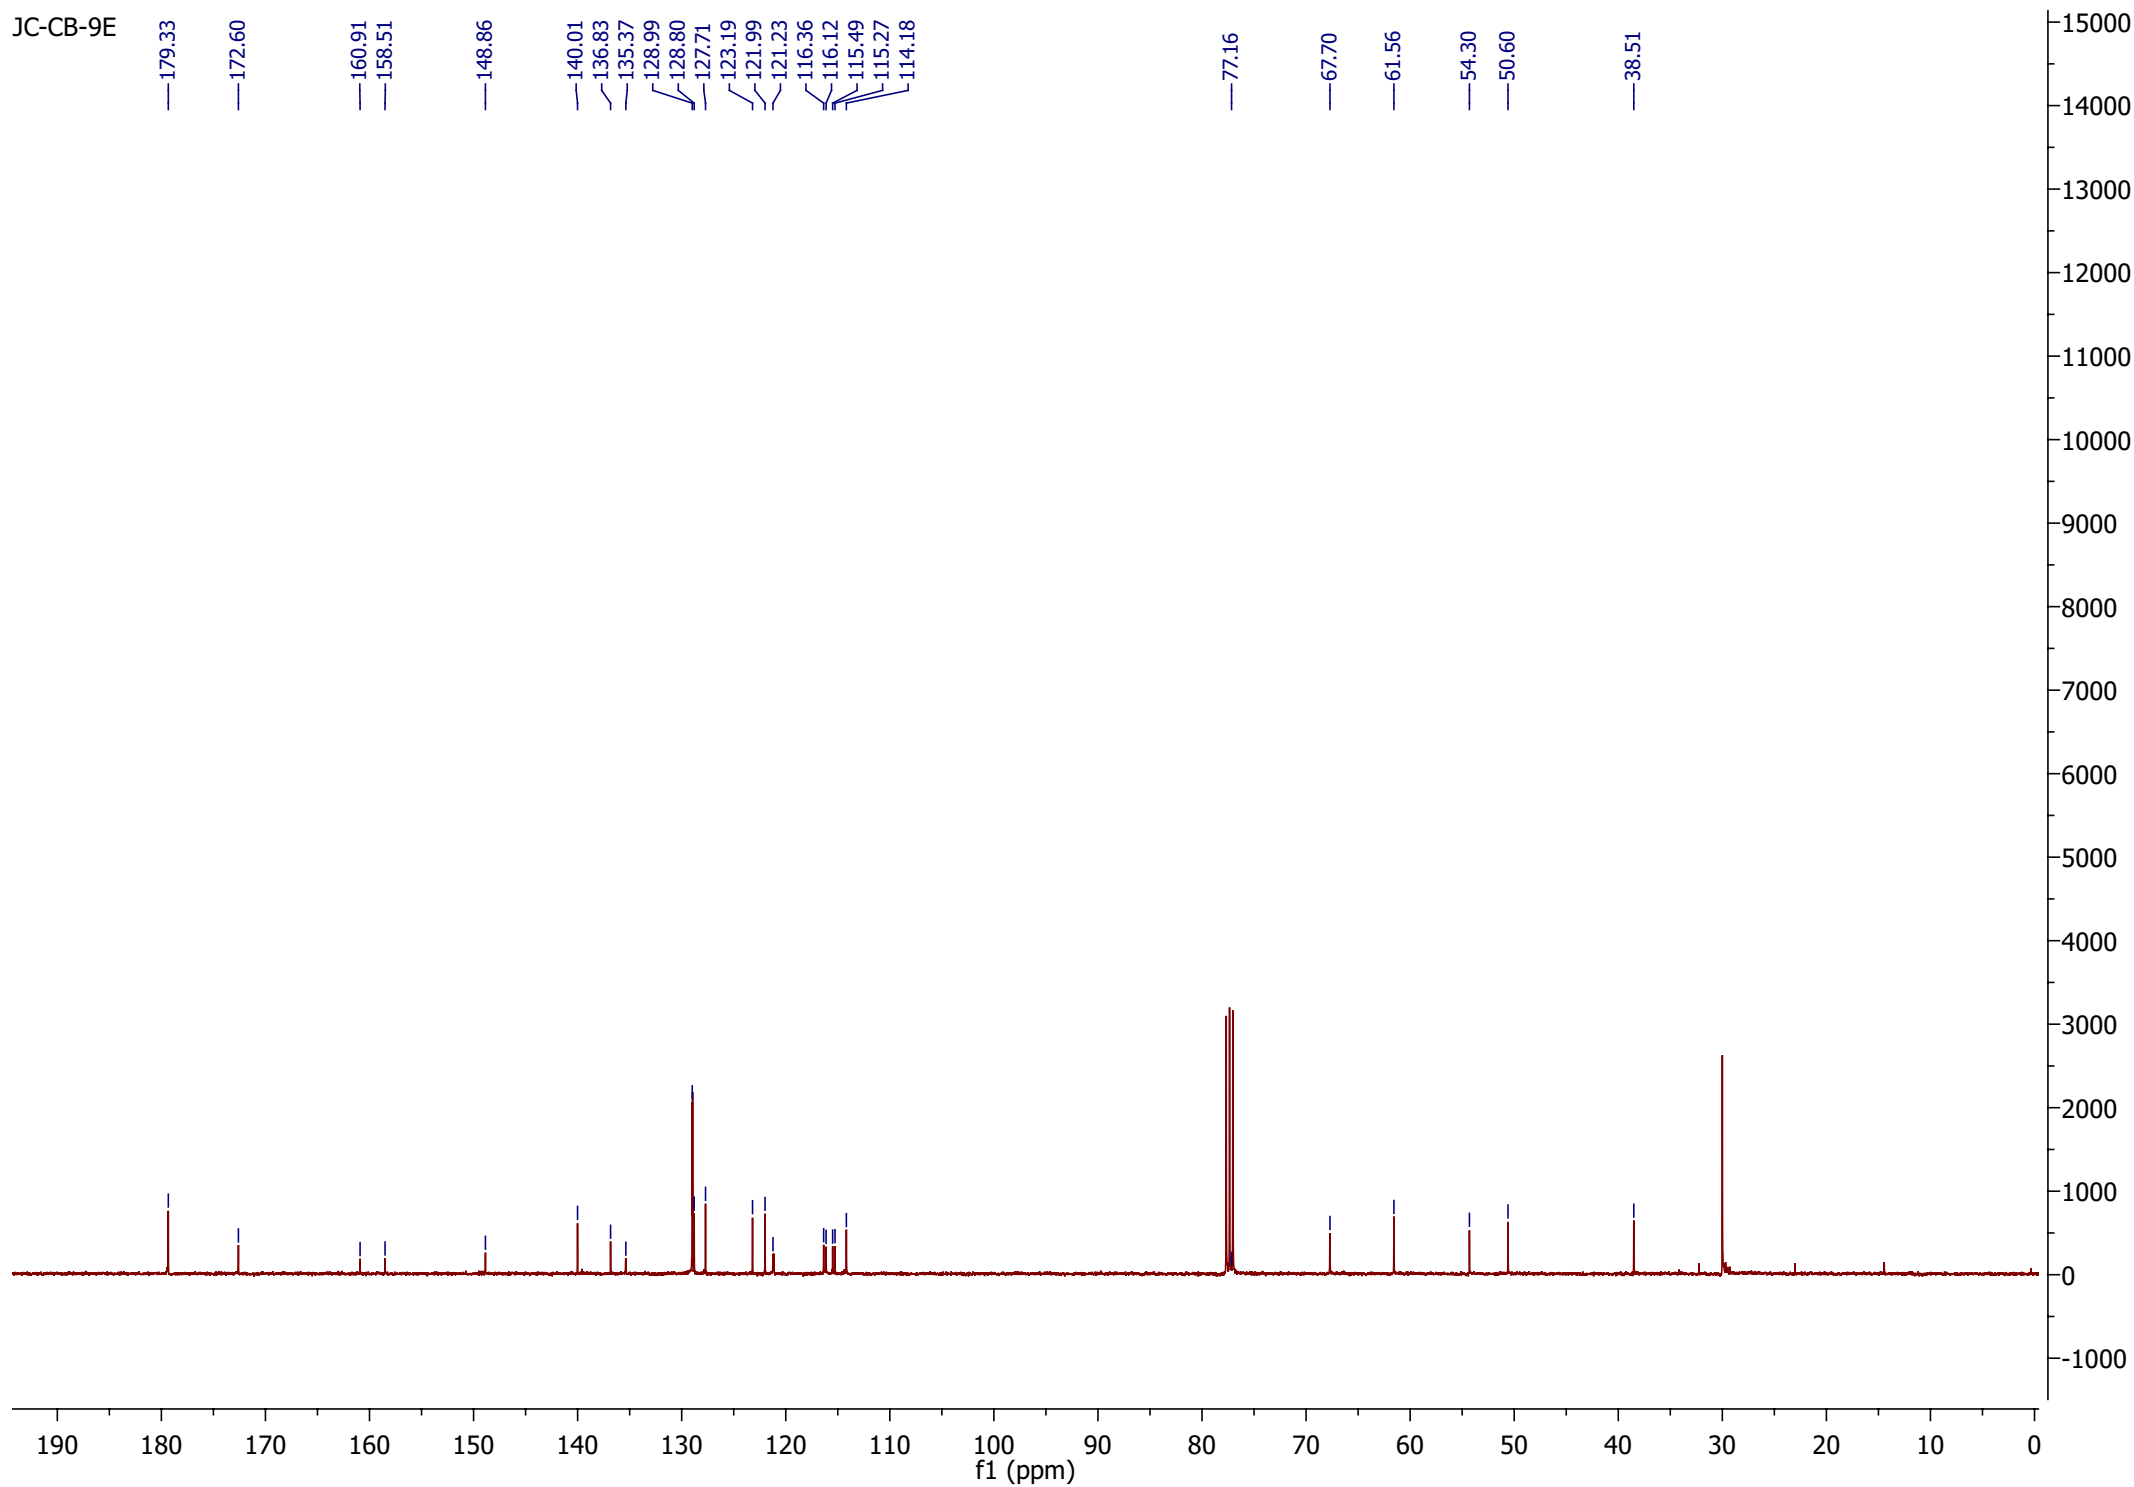



Feb08-2017  
C.S-37

9f

Chloroform-d

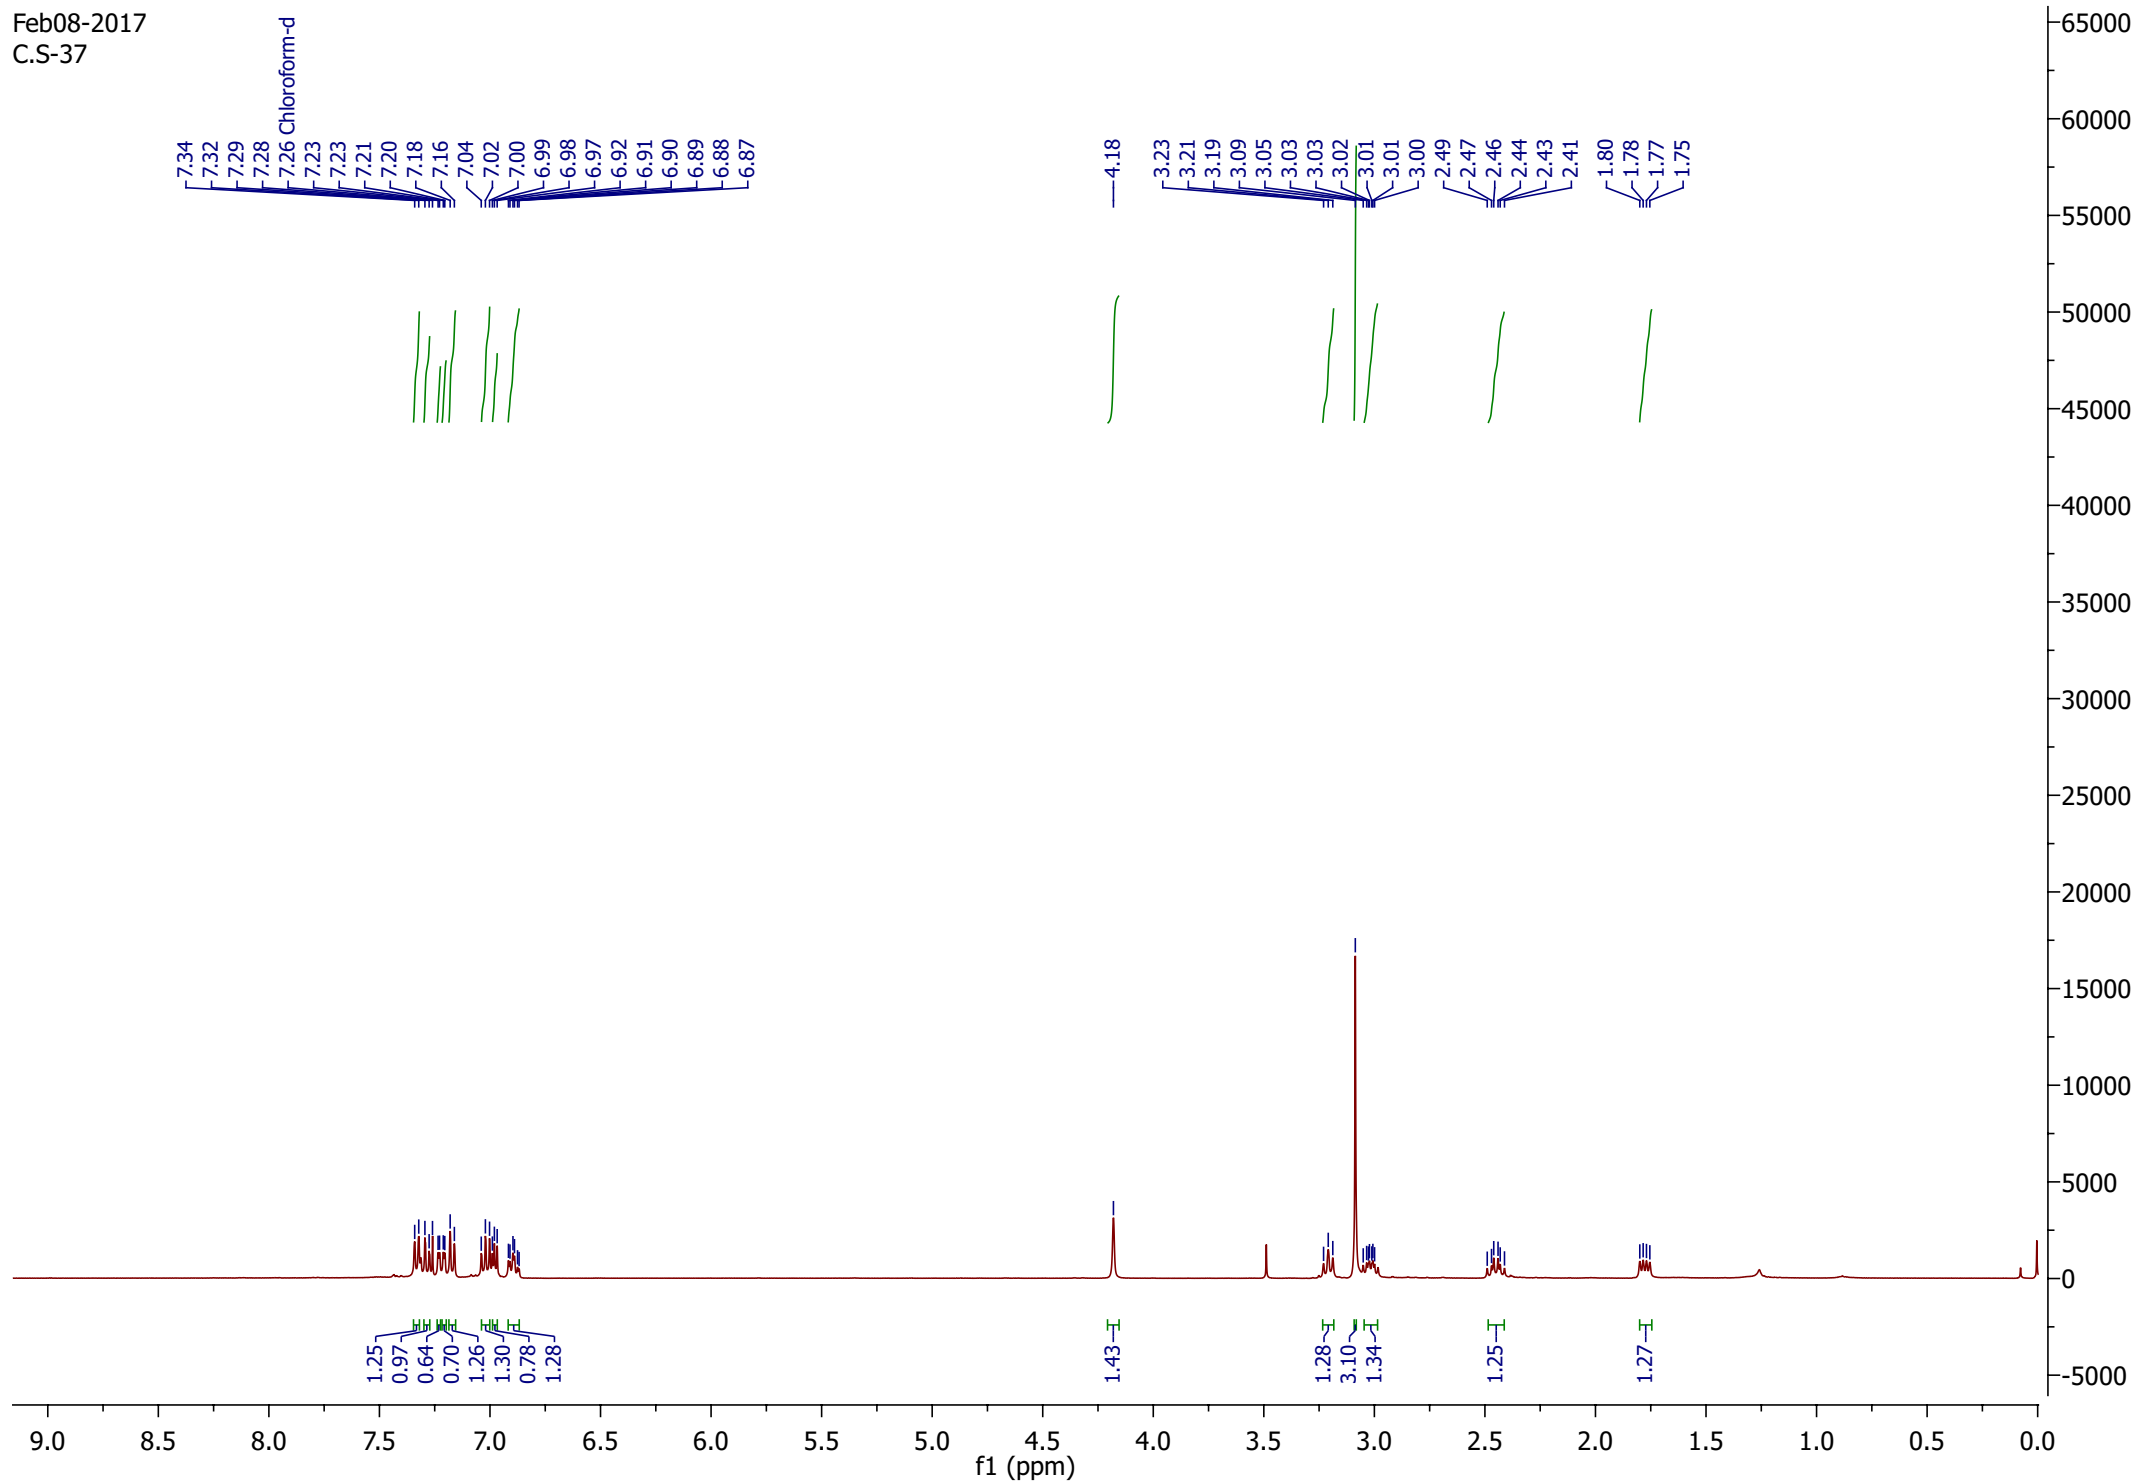

Feb08-2017  
C.S-37

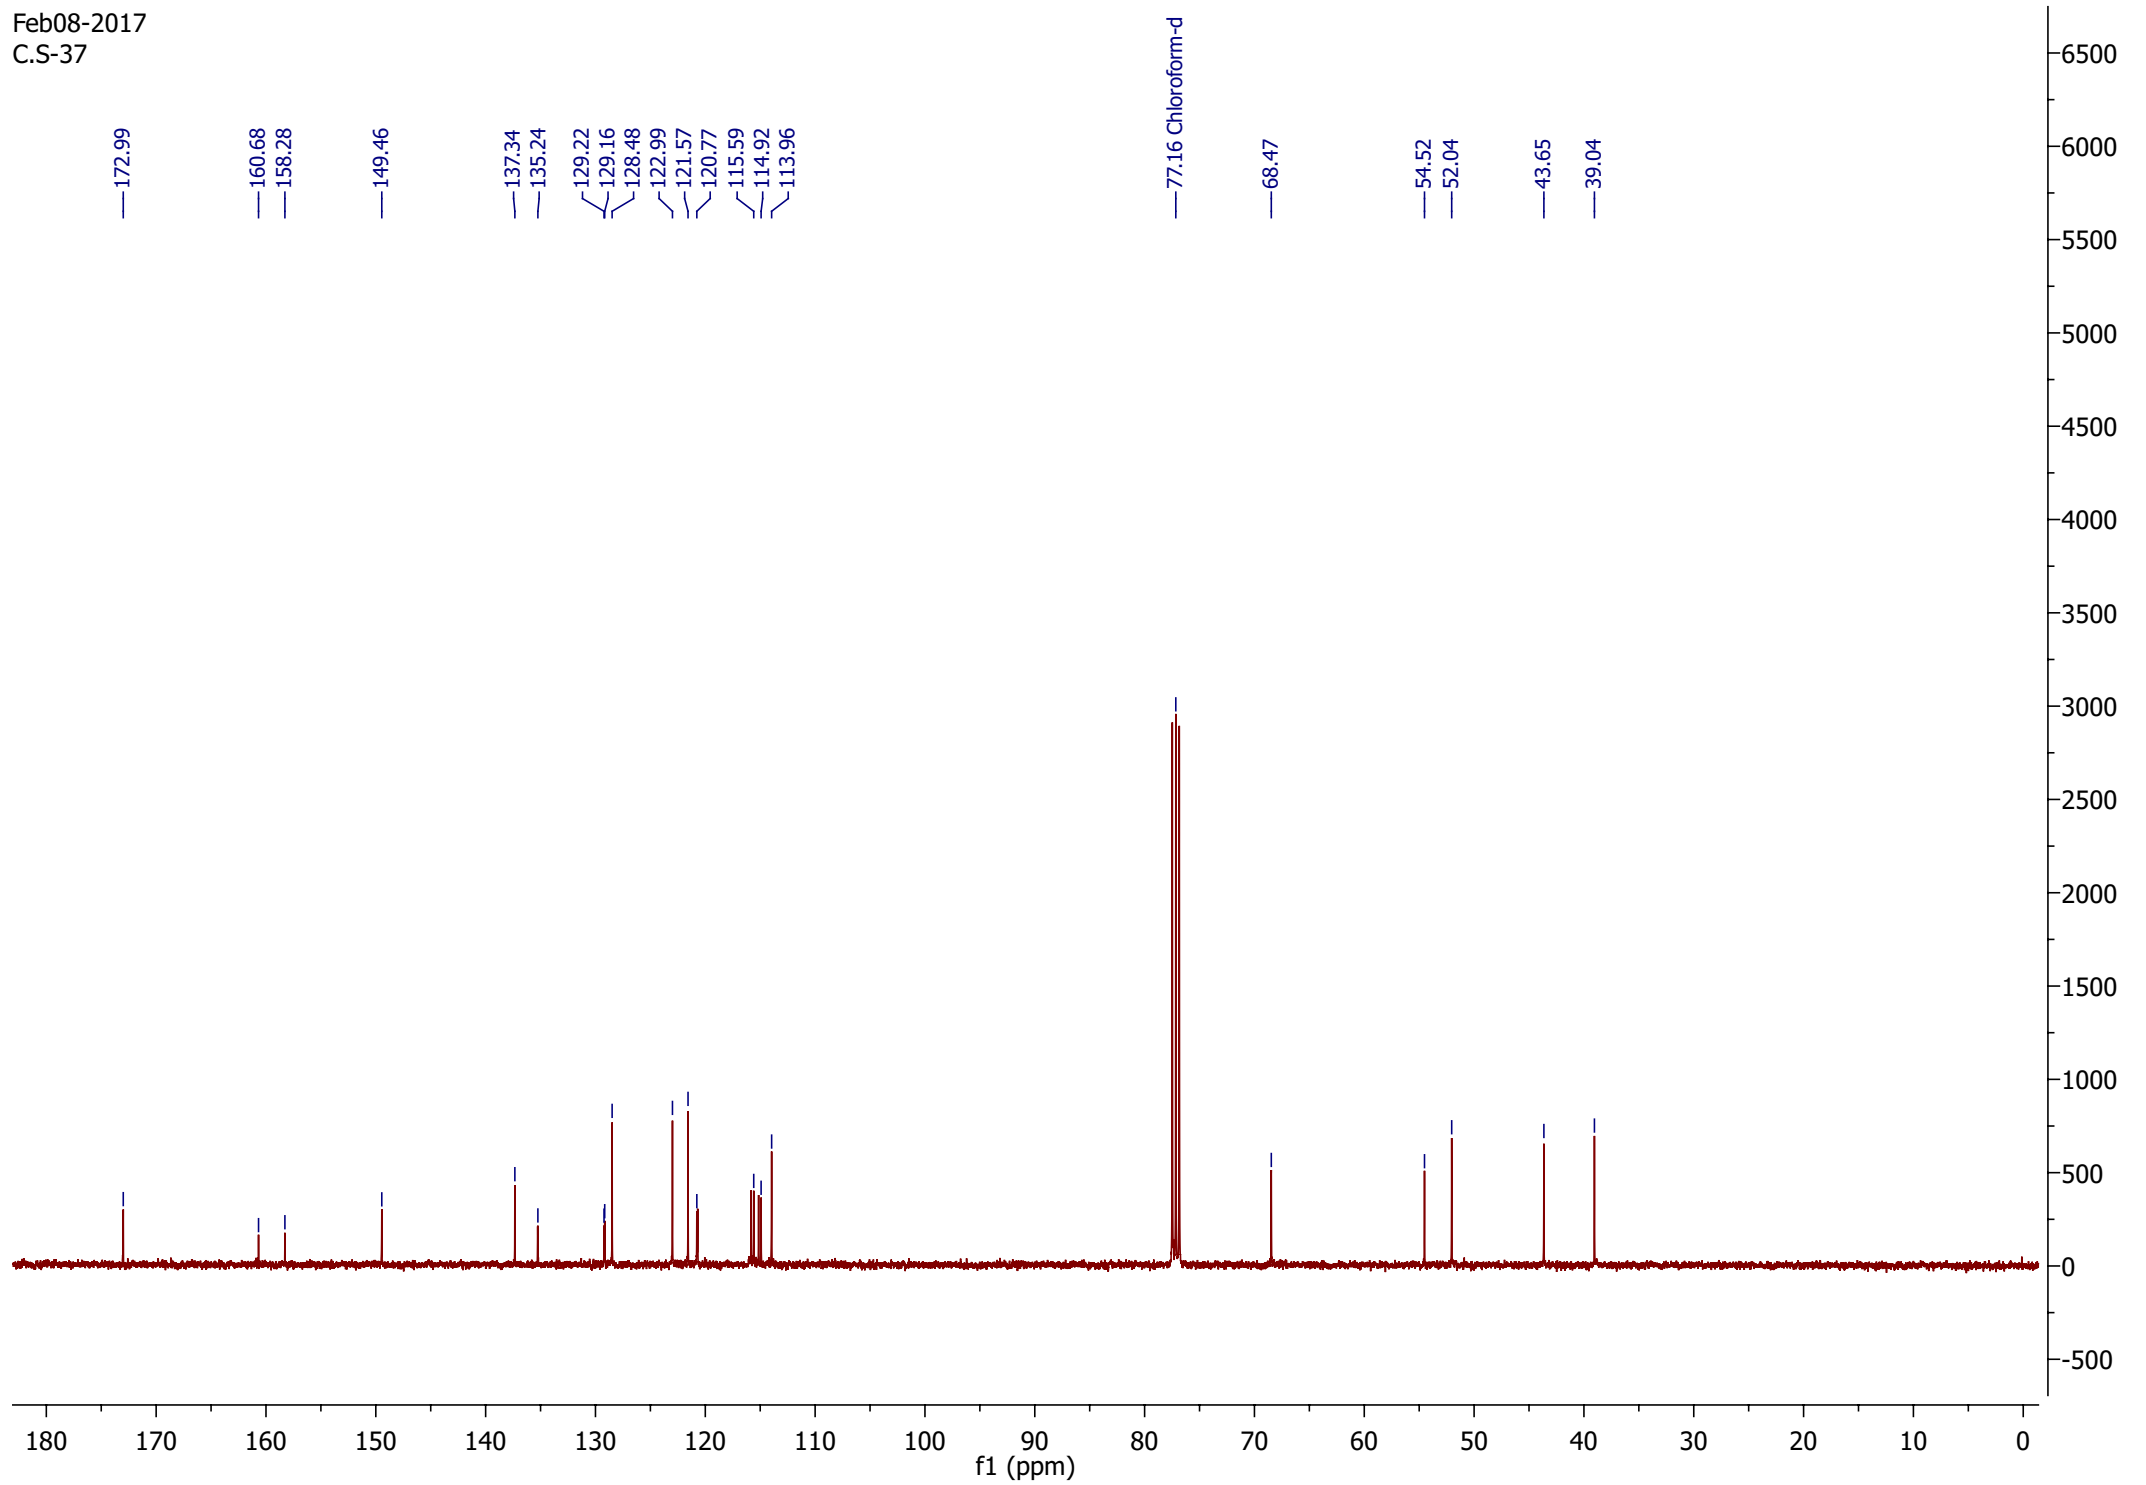

Feb14-2017  
C.S.-40

9g

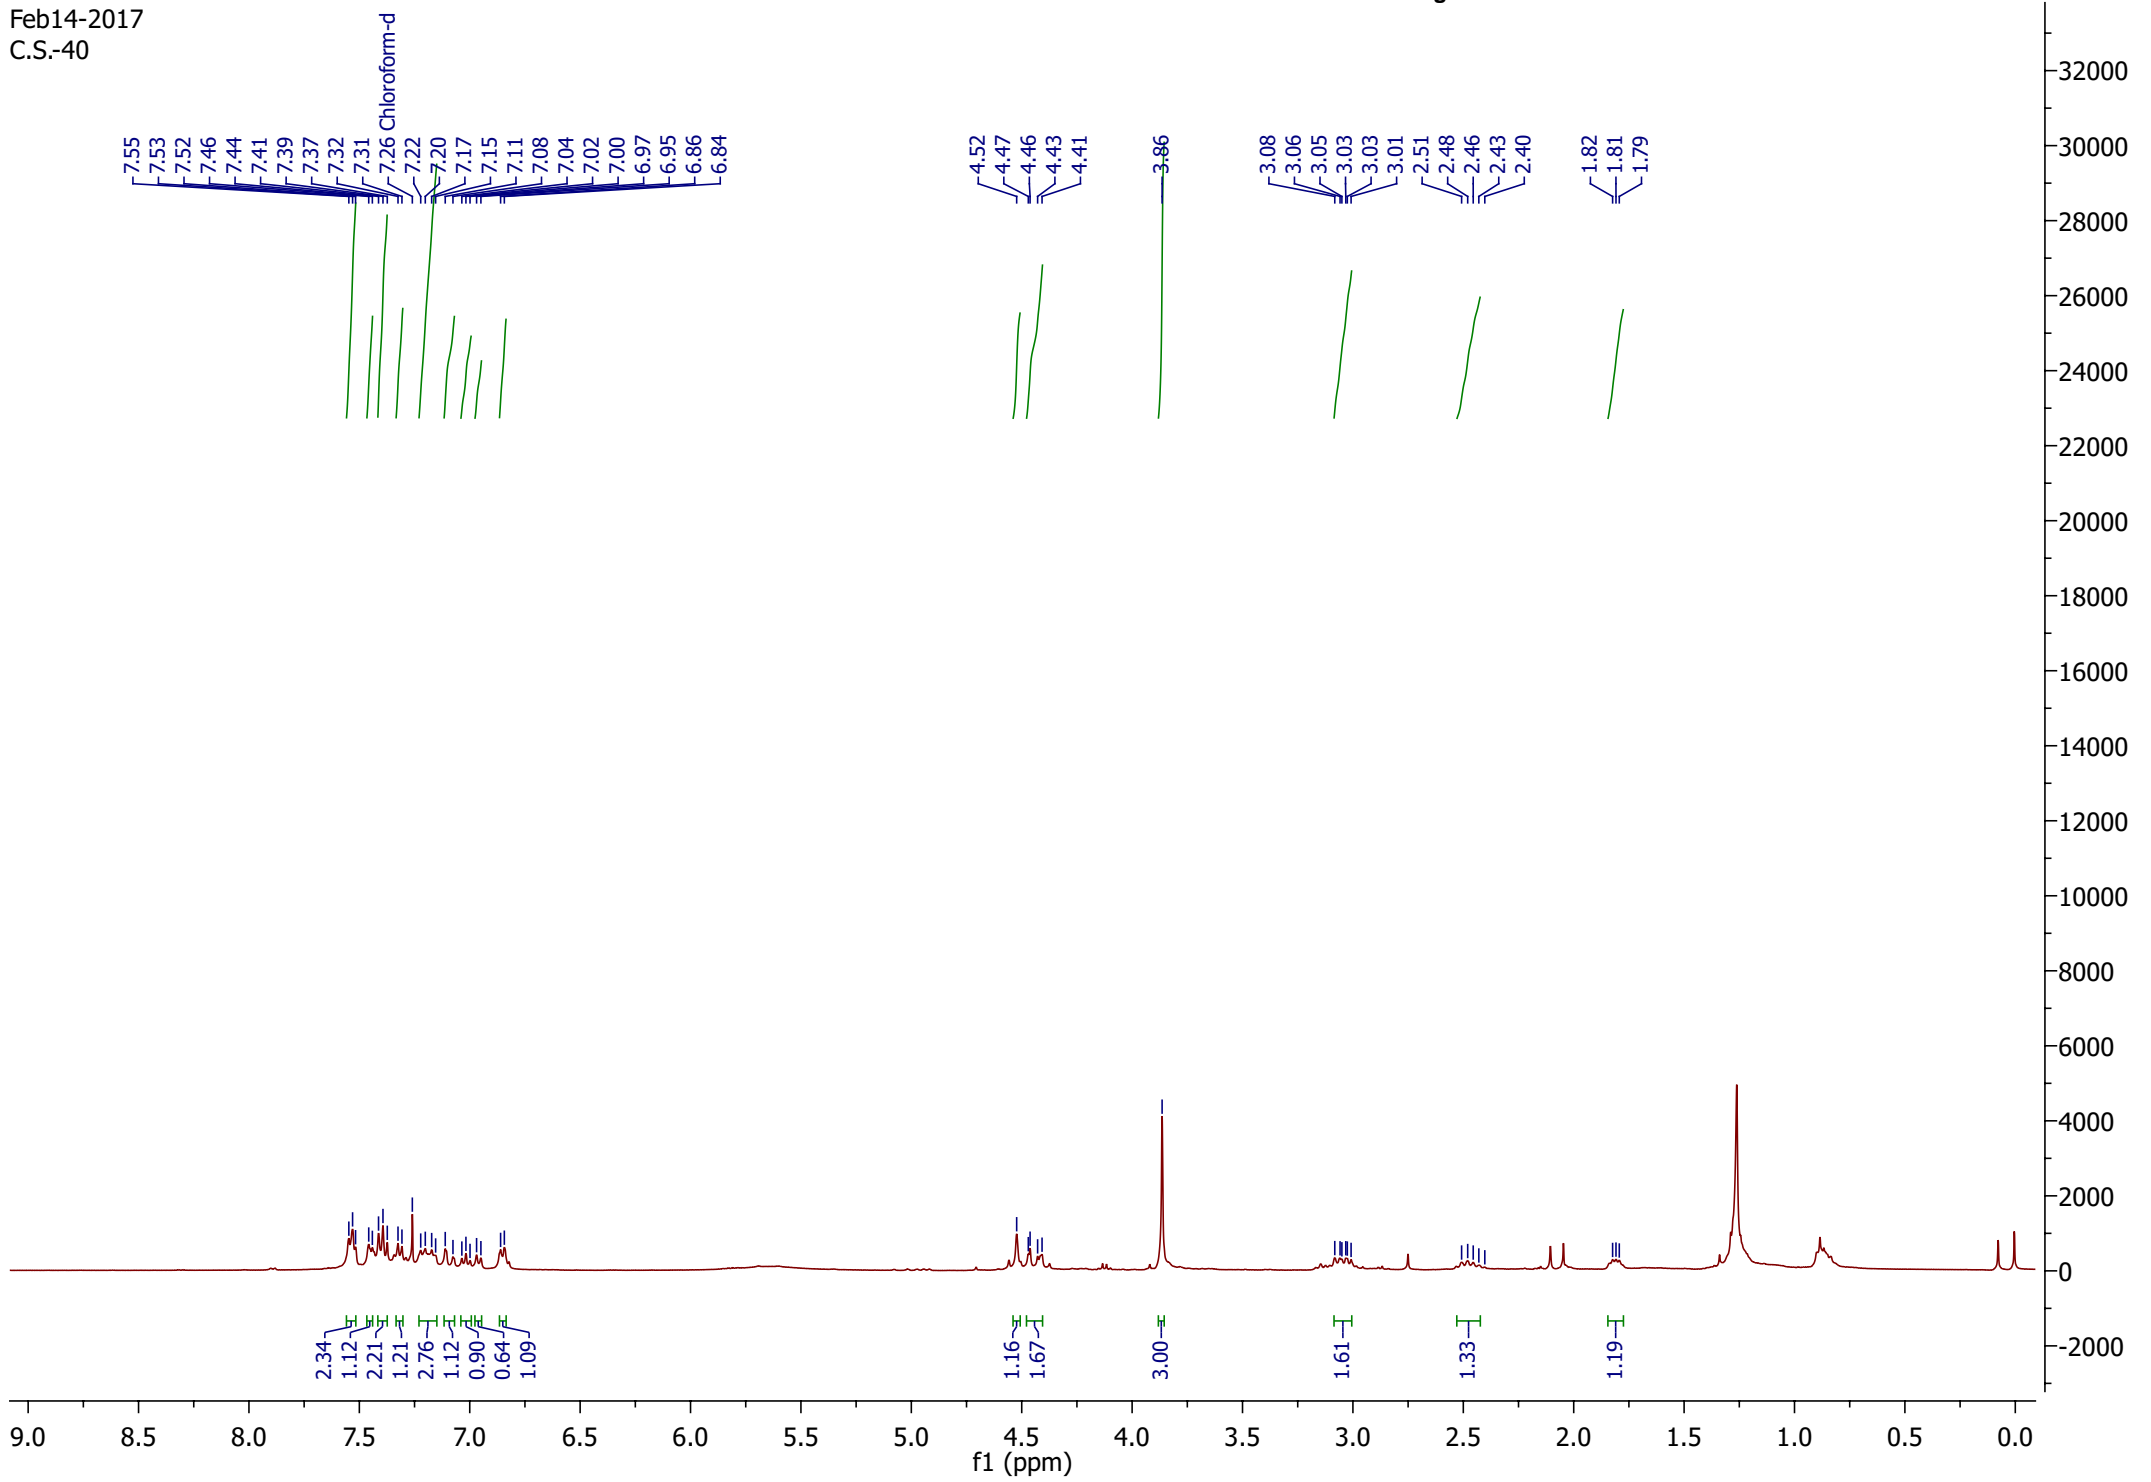

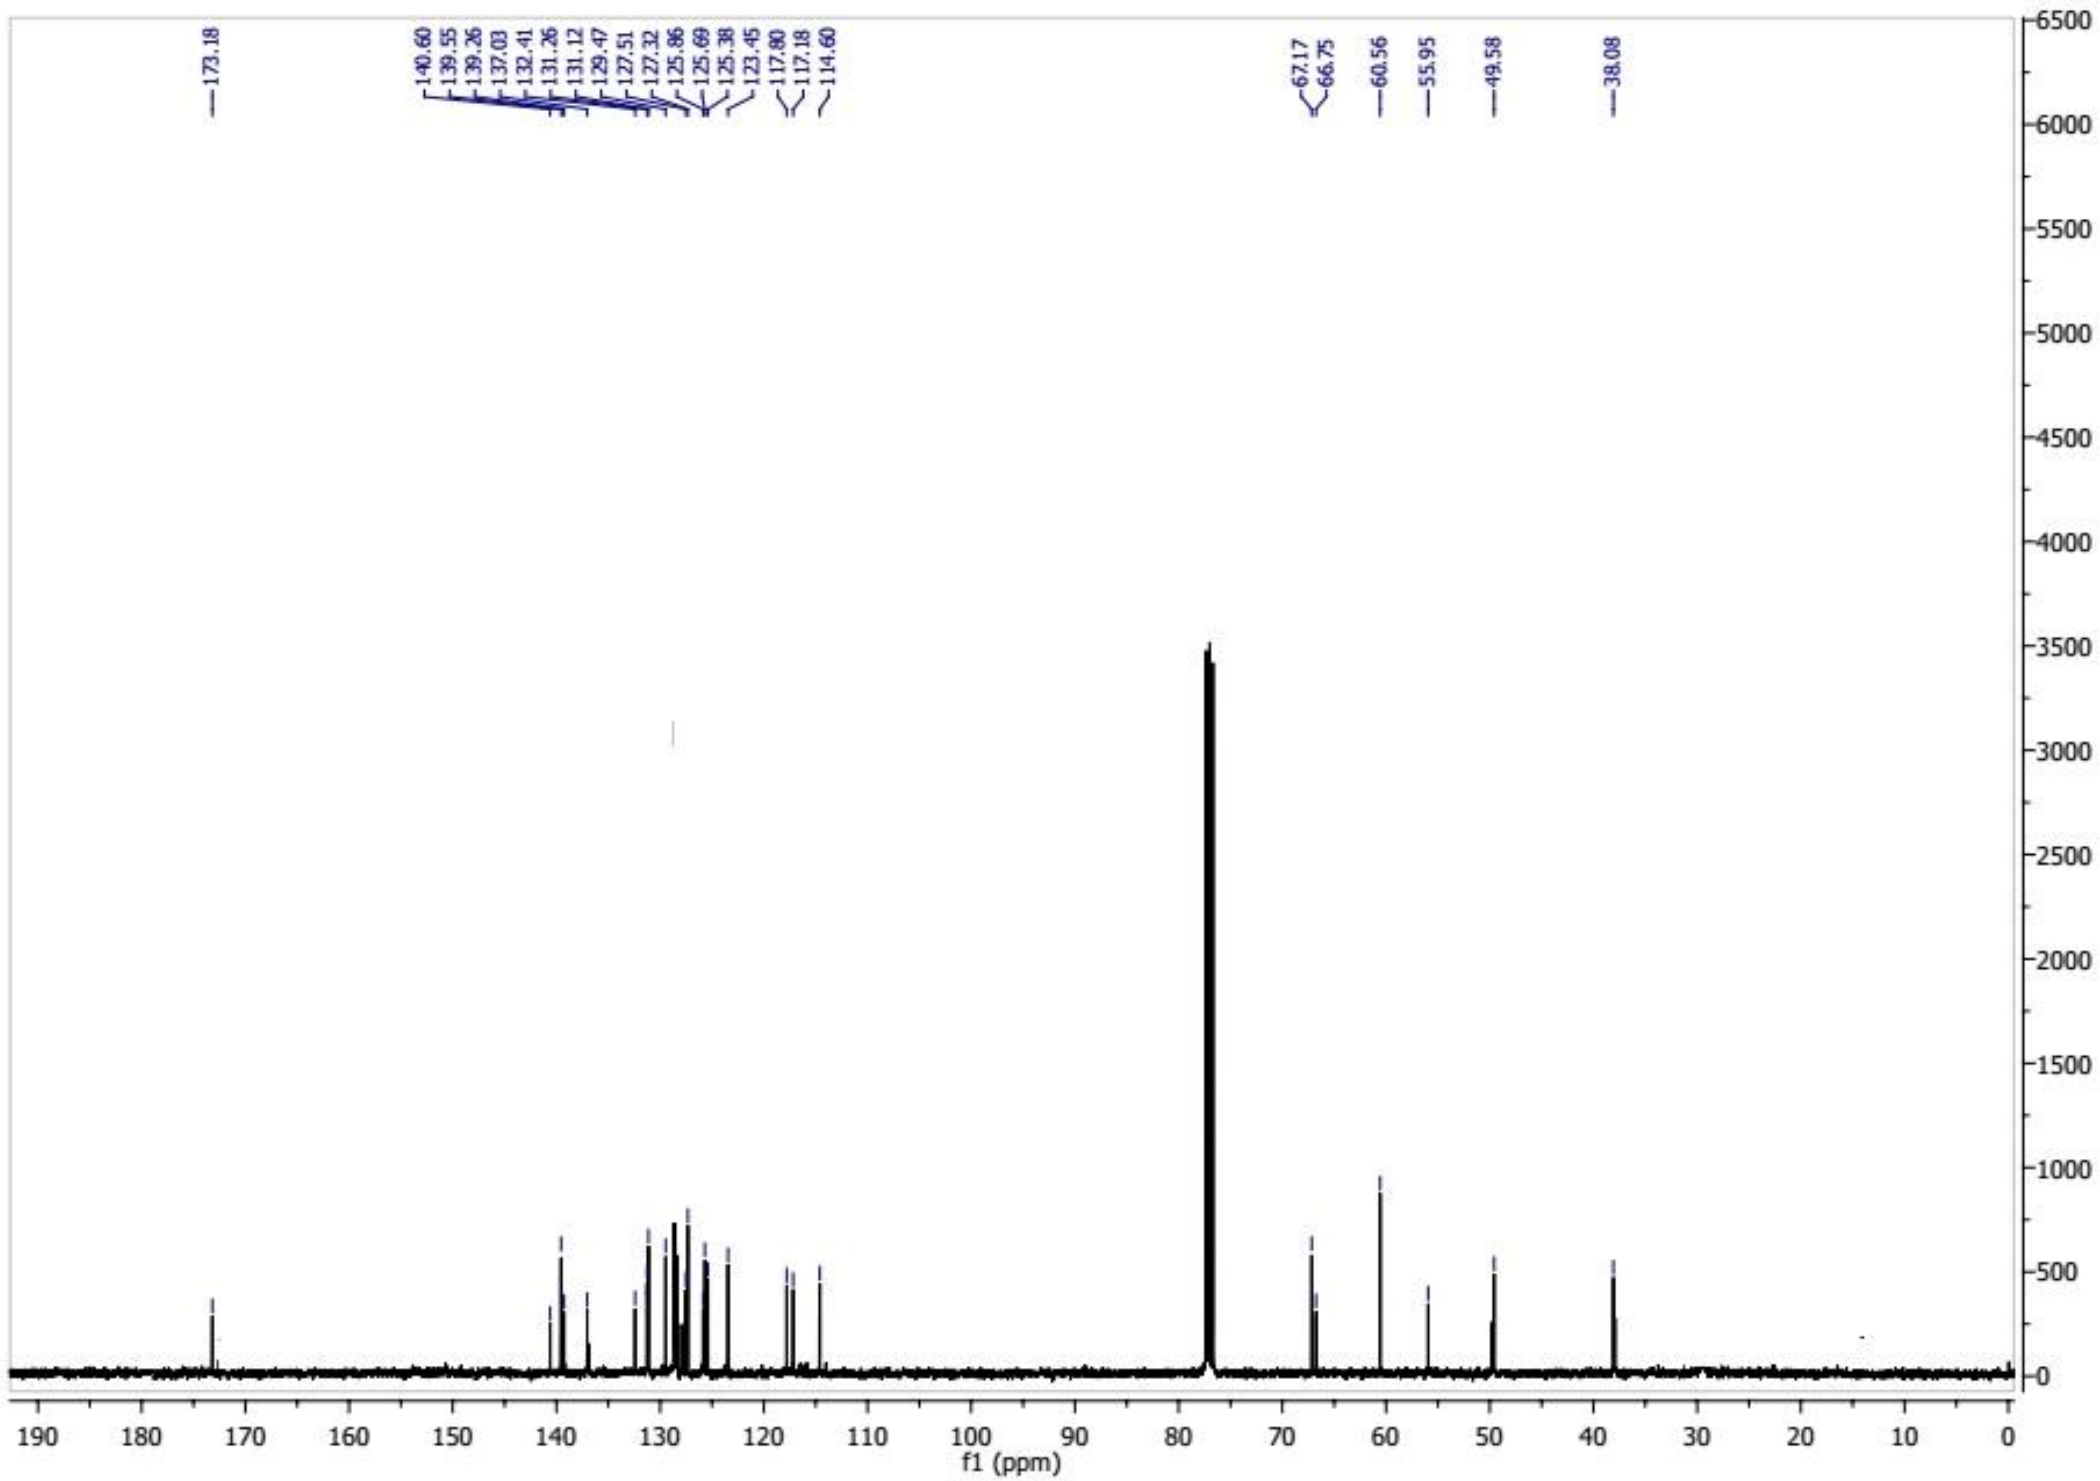

Jan09-2018  
JC-CB-9h

9h

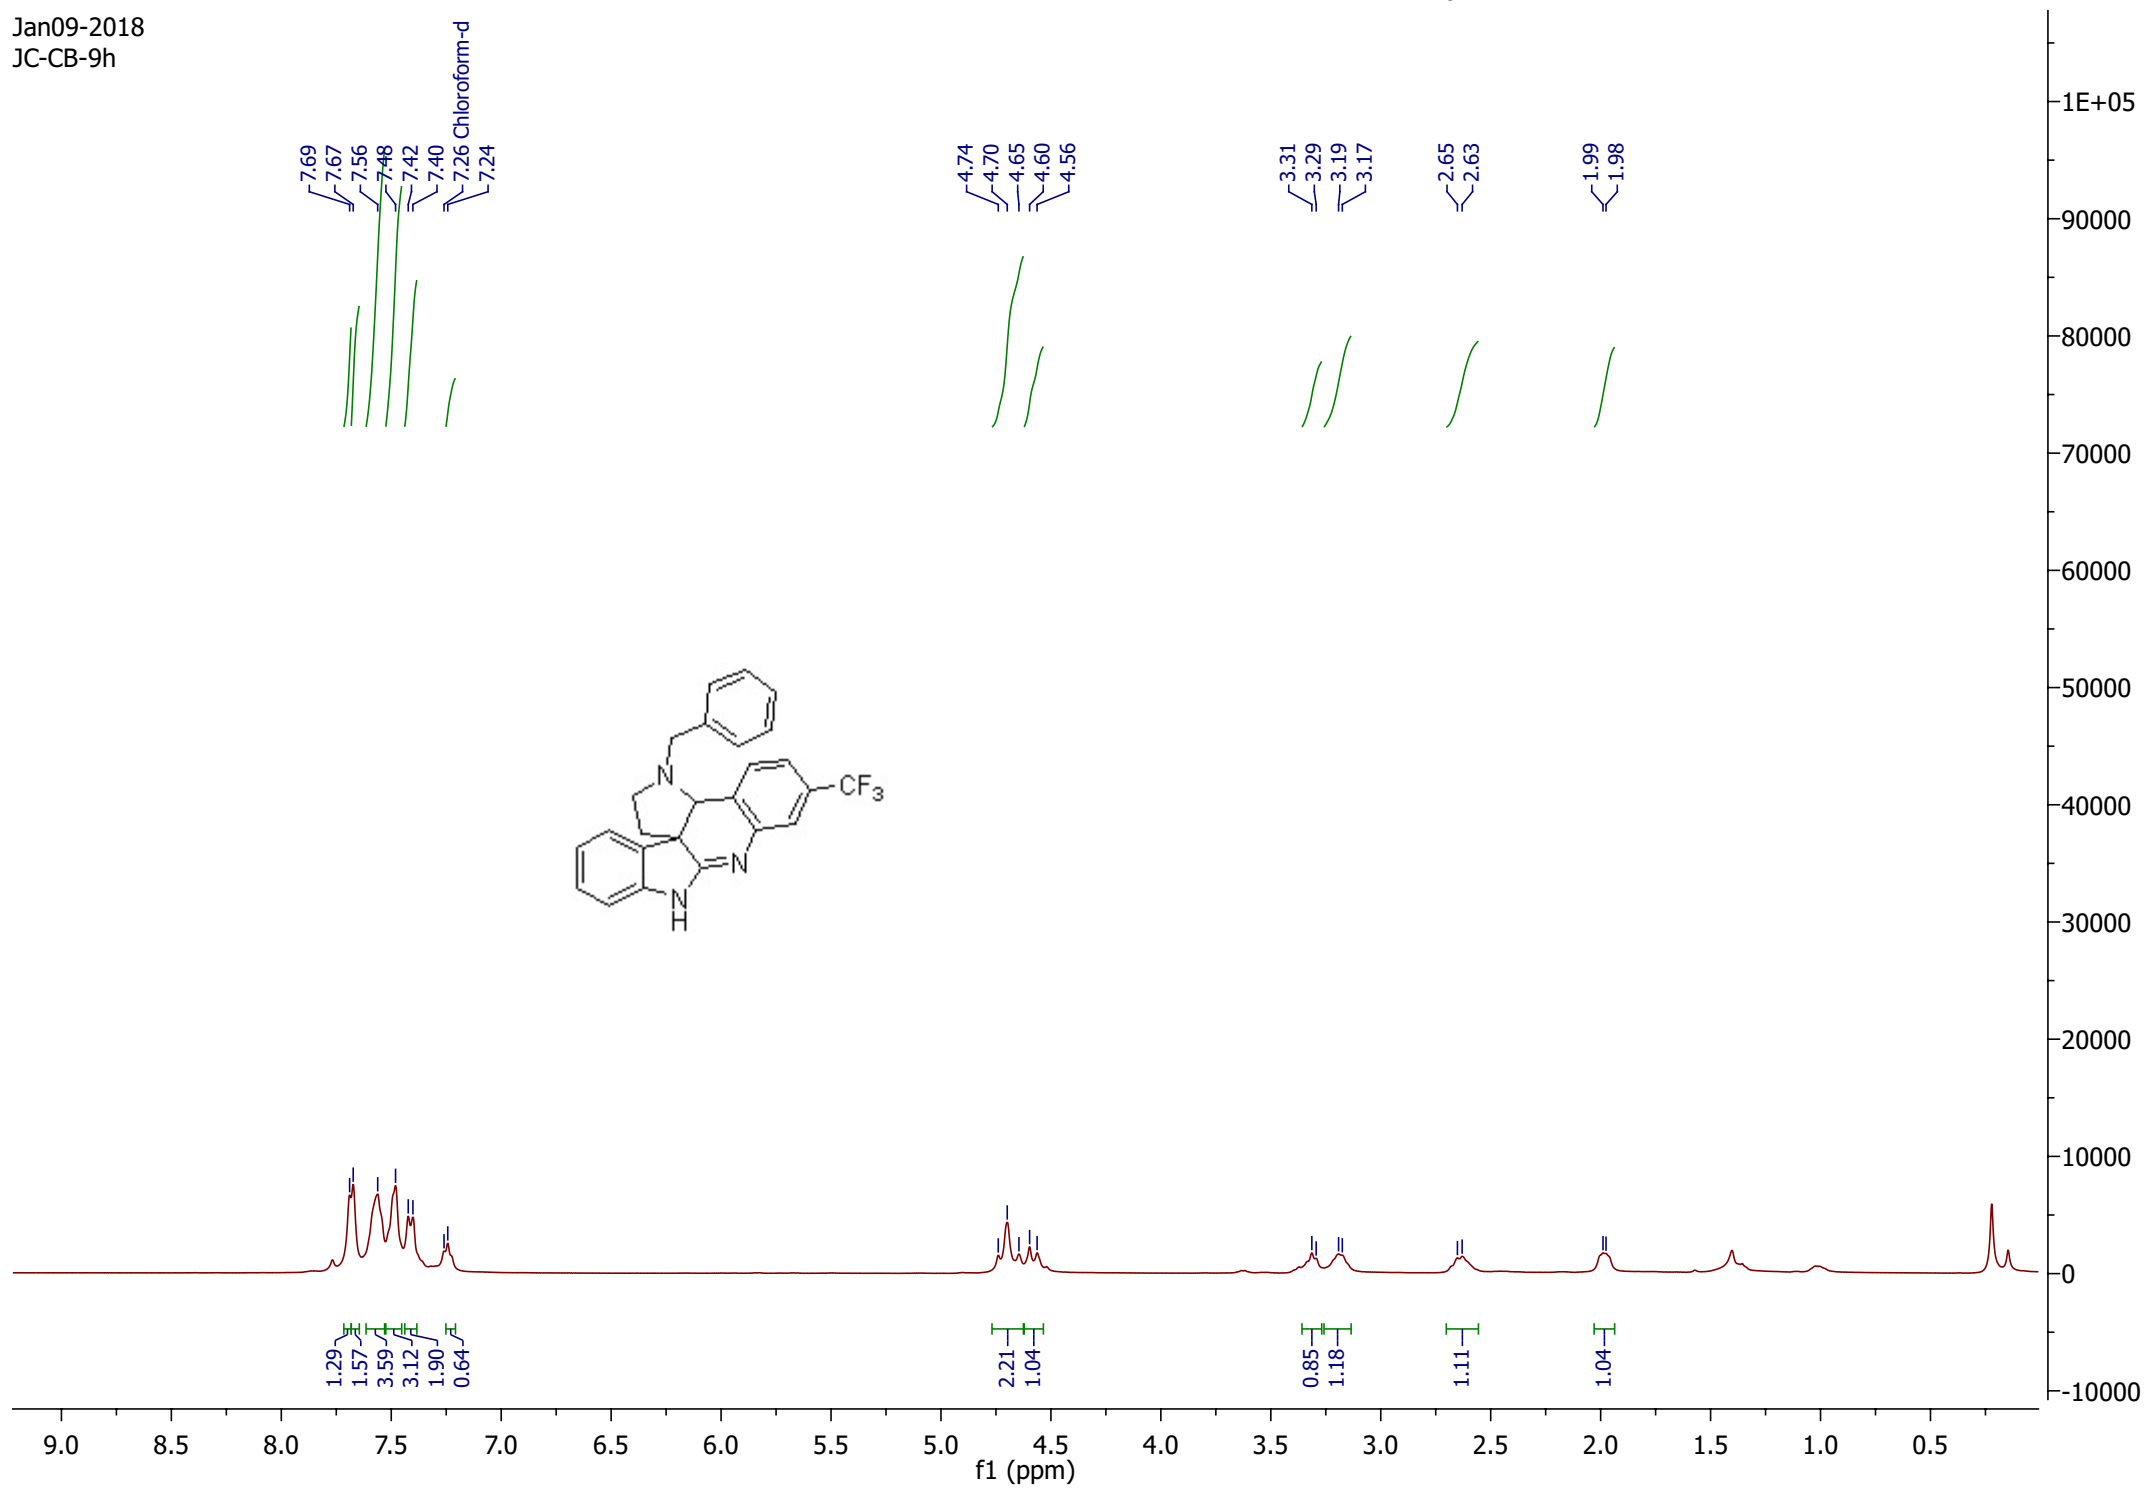



Jan09-2018  
JC-CB-9h

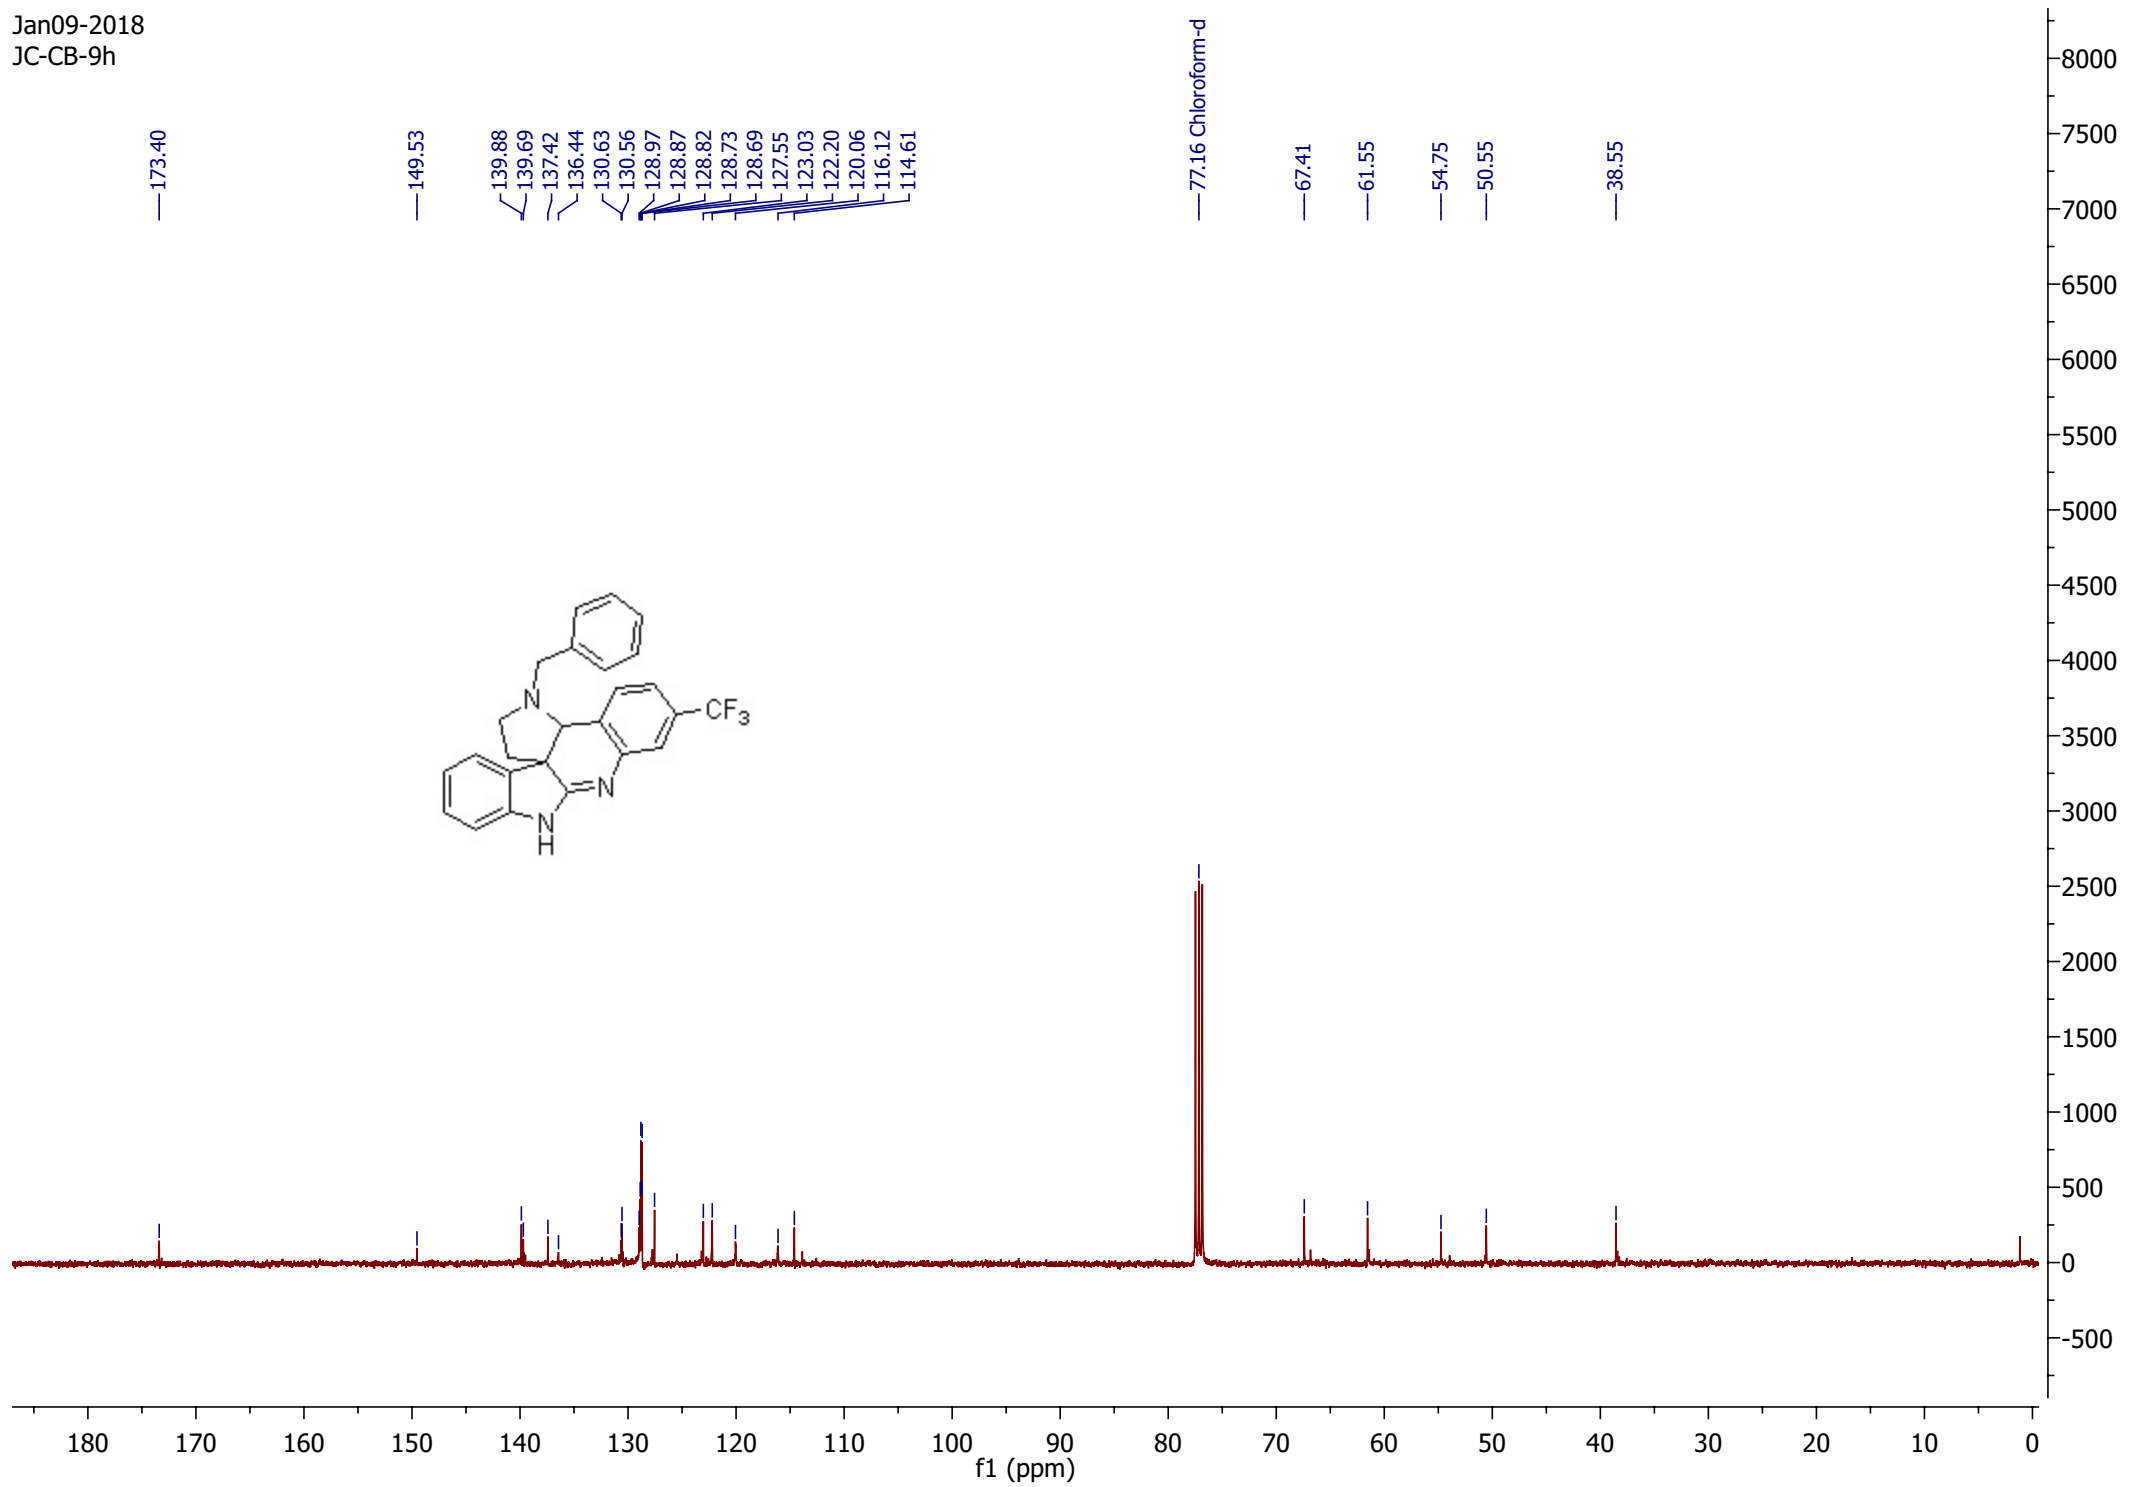

Jan11-2018  
JC-CB-9I

9i

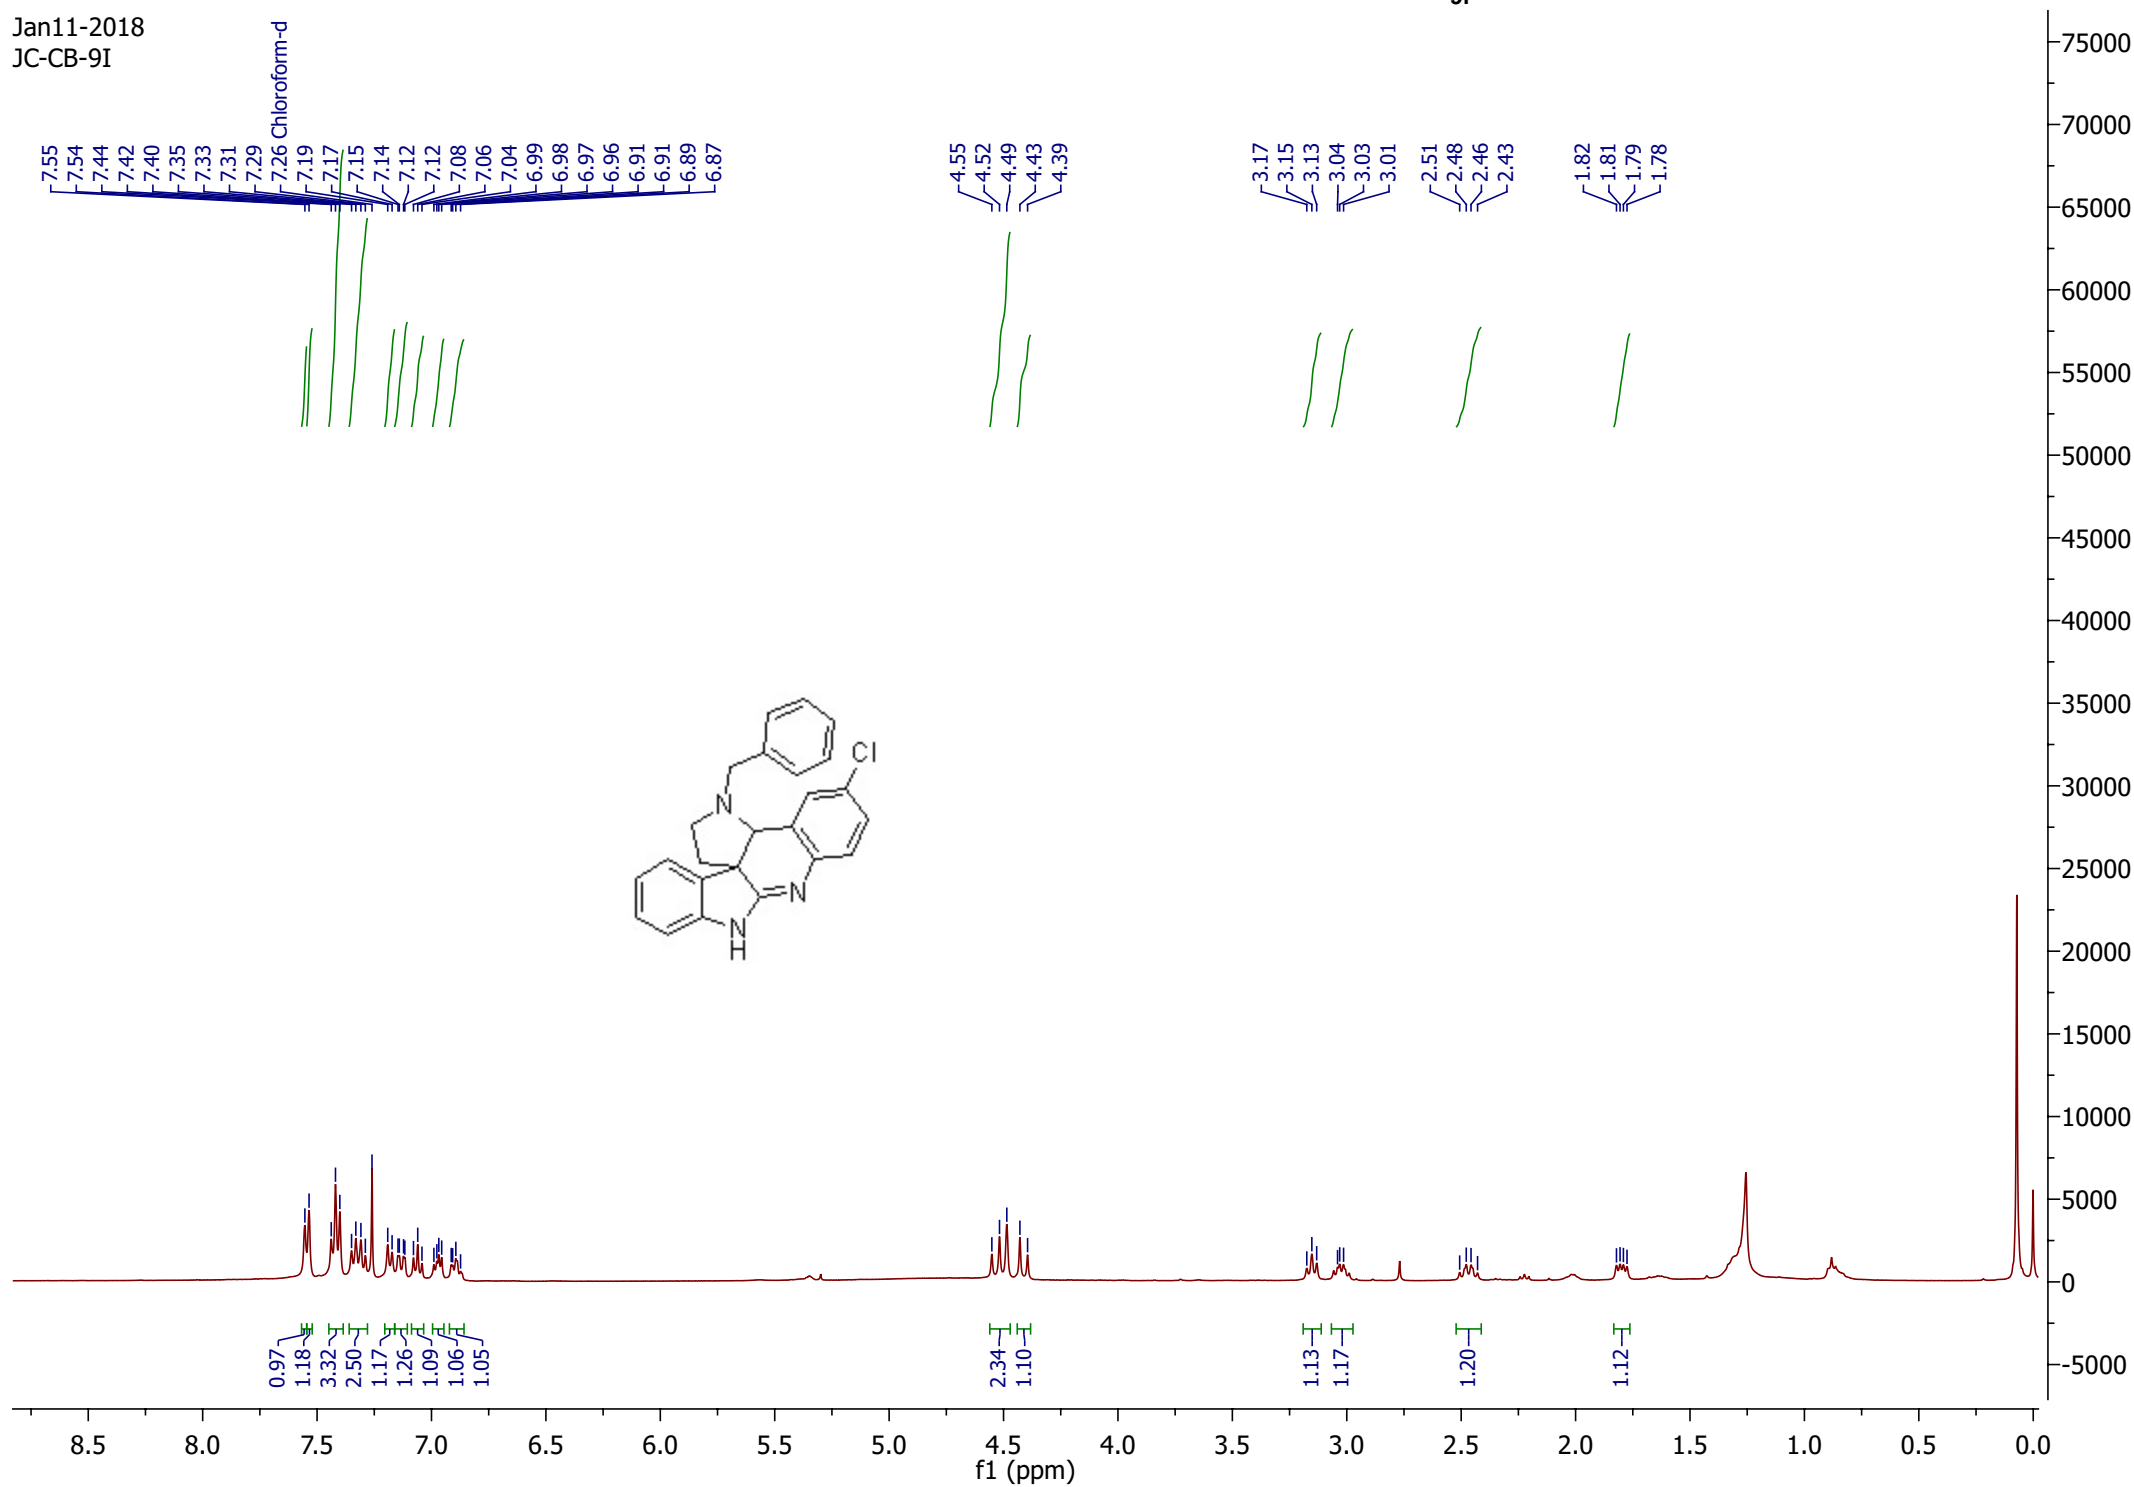

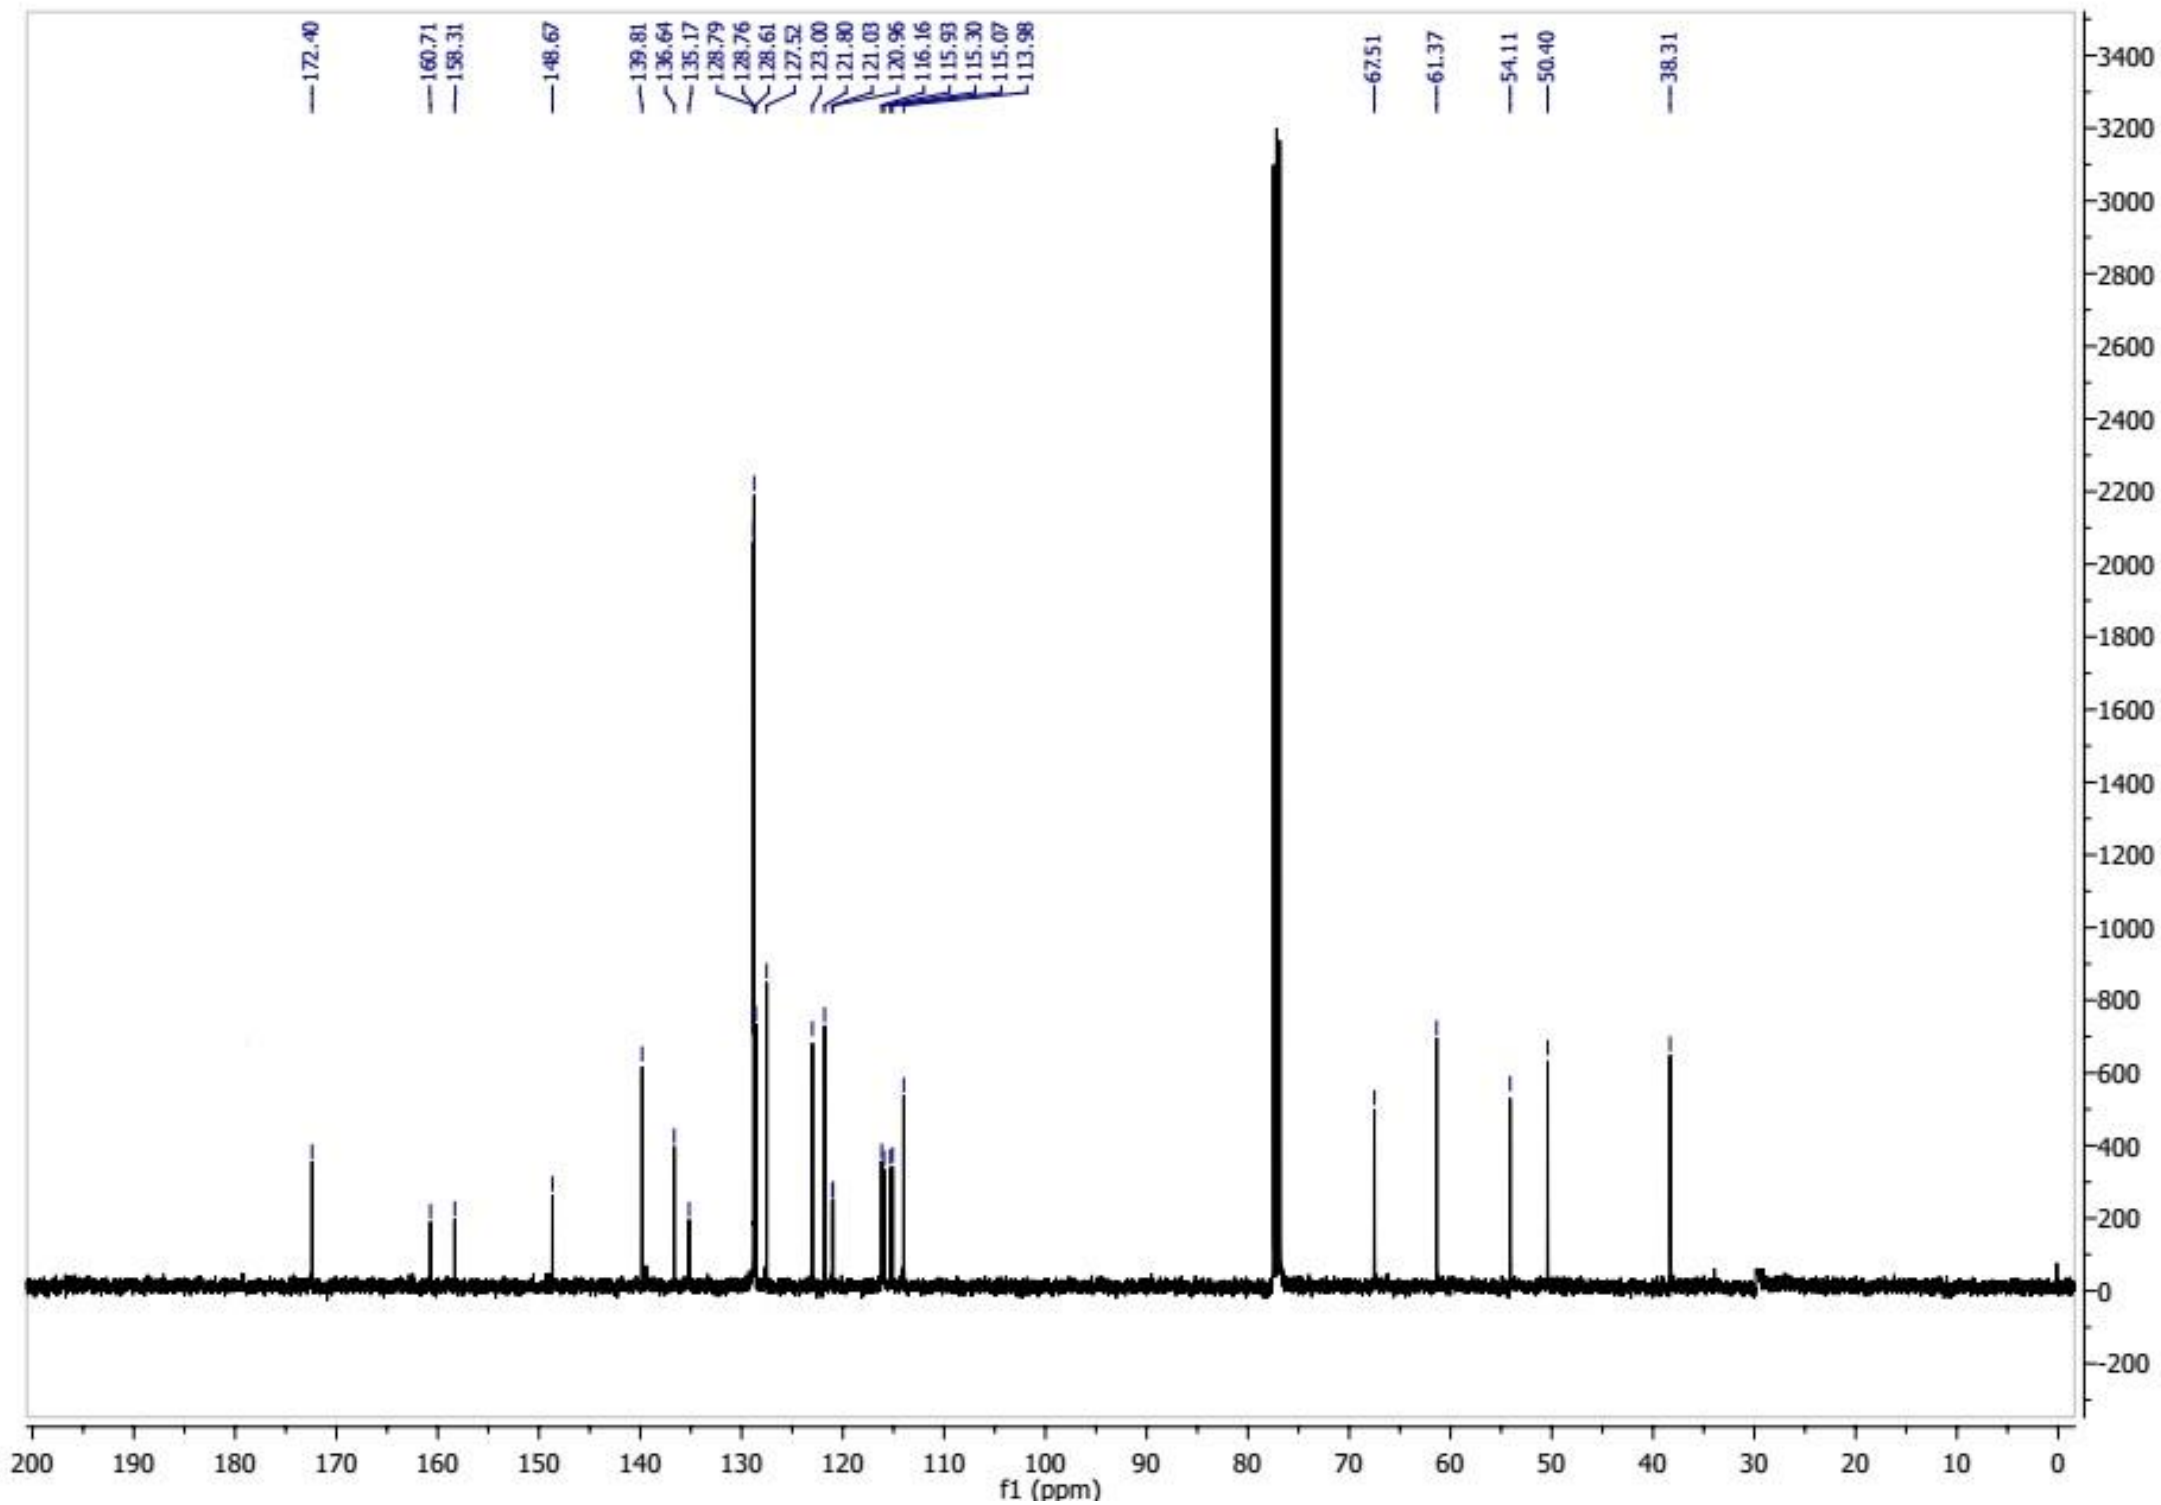

9j

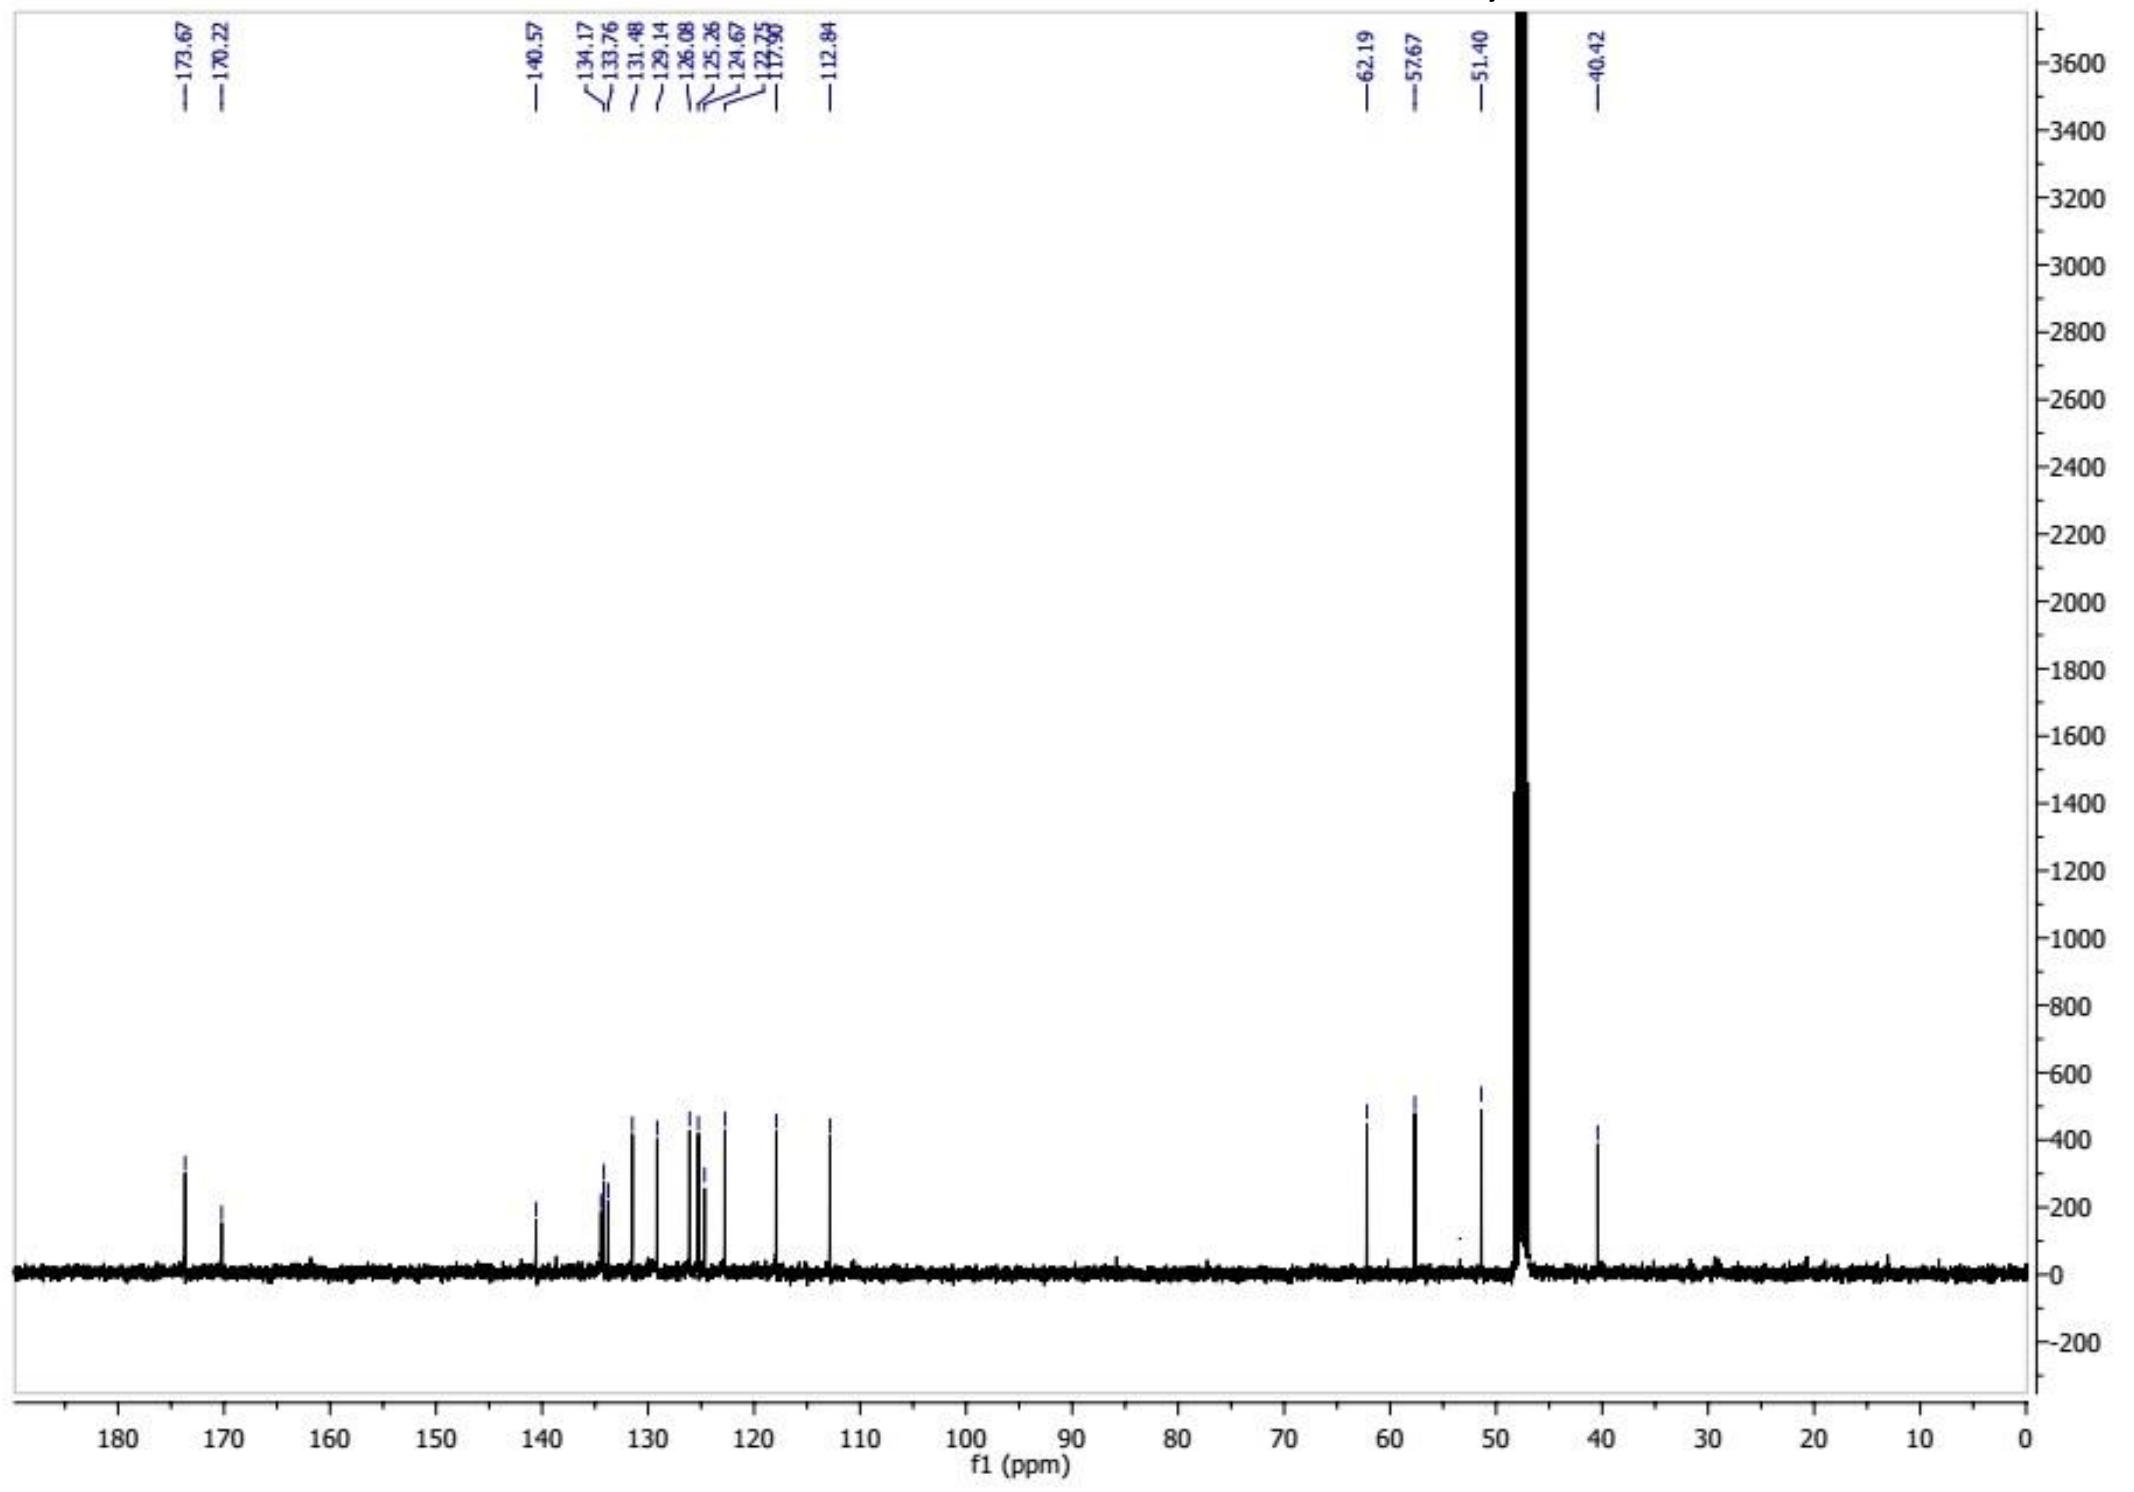

Mar20-2017  
CB-TFRN-RED

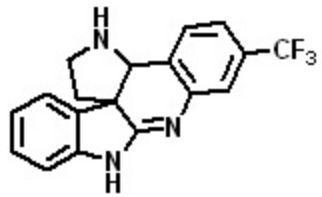

10.53

7.76  
7.74  
7.52  
7.50  
7.31  
7.29  
7.23  
7.21  
7.19  
7.06  
7.04  
6.96  
6.94  
6.92

4.49

3.29  
3.27  
3.24  
3.22  
3.18  
2.81  
2.79  
2.76

2.07  
2.05  
2.02  
1.99  
1.66  
1.64  
1.61

1.00

0.87  
0.94  
1.18  
1.94  
1.08  
0.91

0.97

0.85  
1.07

1.10  
1.05

11.5 11.0 10.5 10.0 9.5 9.0 8.5 8.0 7.5 7.0 6.5 6.0 5.5 5.0 4.5 4.0 3.5 3.0 2.5 2.0 1.5 1.0 0.5

f1 (ppm)

18000  
17000  
16000  
15000  
14000  
13000  
12000  
11000  
10000  
9000  
8000  
7000  
6000  
5000  
4000  
3000  
2000  
1000  
0  
-1000
